# Supplementary material for: Chimeric Newcastle Disease Virus Vectors Expressing Human IFN-γ Mediate Target Immune Responses and Enable Multifaceted Treatments
Source: MDPI journal article supplement (doi:10.3390/biomedicines11020455), 2023-02-04
Supplement: s1 [file s1]

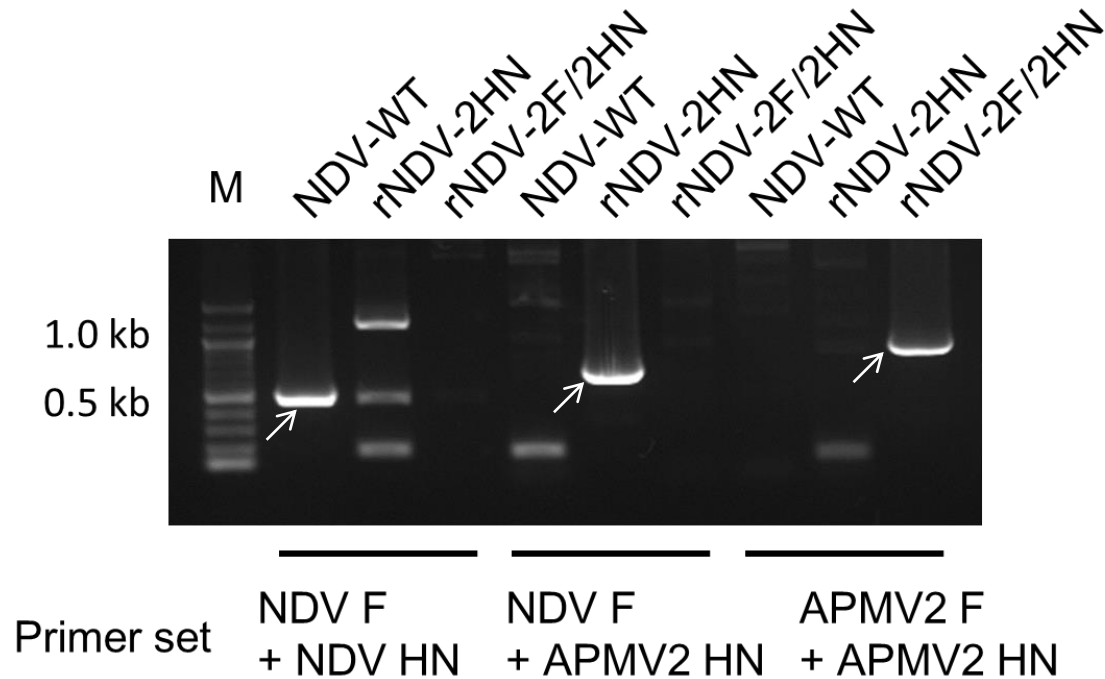

**Figure S1. Electrophoresis indicated higher intensity specific band and lower intensity non-specific bands using plasmids.**

Electrophoresis of PCR which amplified plasmid inserted in each viral genome using each primer set. Arrows indicate expected size.

A

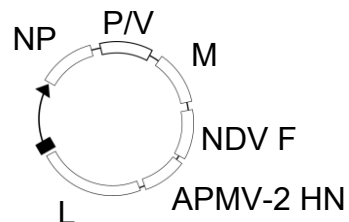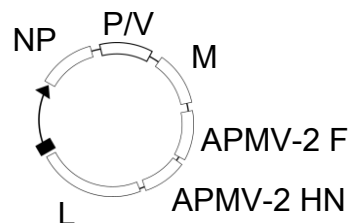

Plasmids  
for rescue experiments

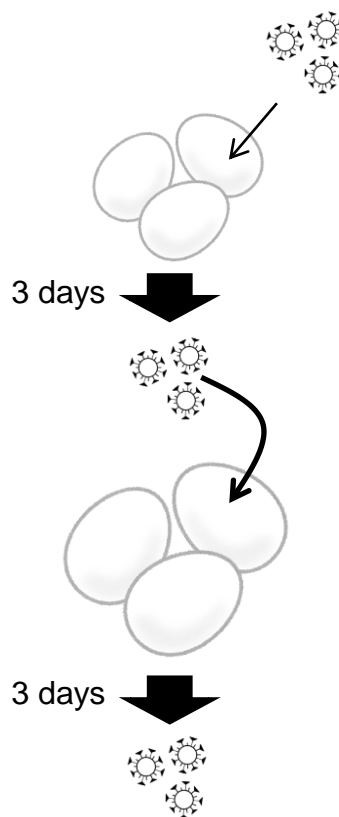

Viruses were passaged in  
embryonated eggs  
more than twice

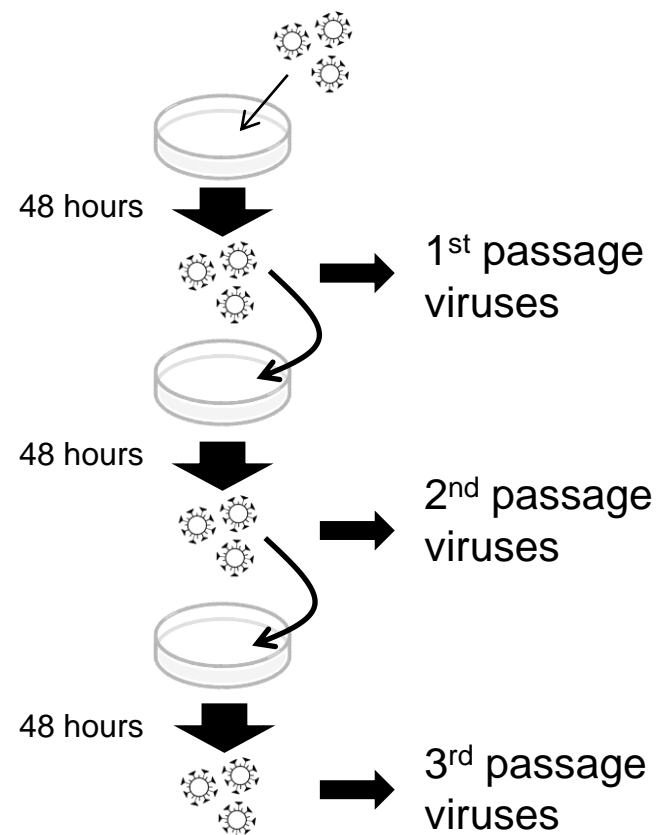

Viruses were passaged in  
HEp-2 cells  
(1<sup>st</sup>, 2<sup>nd</sup>, and 3<sup>rd</sup> passage  
viruses were sequenced)

B

## rNDV-2HN (NDV F gene)

Plasmid : Plasmids for rescue experiments  
 Egg : Viruses were propagated in embryonated eggs  
 1st Cell :  
 2nd Cell :  
 3rd Cell : Each passage viruses in HEp-2 cells

|          |      |                                                                                                                             |      |
|----------|------|-----------------------------------------------------------------------------------------------------------------------------|------|
| Plasmid  | 1    | ATGGGCTCCAGACCTTCTACCAAGAACCAGCACCTATGATGCTGACTATCCGGGTCGGCTGGTACTGAGTTGCATCTG                                              | 120  |
| Egg      | 1    | ATGGGCTCCAGACCTTCTACCAAGAACCAGCACCTATGATGCTGACTATCCGGGTCGGCTGGTACTGAGTTGCATCTGTCGGGCAAACCTCCATTGATGGCAGGCGCTTTCGACGTGCA     | 120  |
| 1st Cell | 1    | ATGGGCTCCAGACCTTCTACCAAGAACCAGCACCTATGATGCTGACTATCCGGGTCGGCTGGTACTGAGTTGCATCTGTCGGGCAAACCTCCATTGATGGCAGGCGCTTTCGACGTGCA     | 120  |
| 2nd Cell | 1    | ATGGGCTCCAGACCTTCTACCAAGAACCAGCACCTATGATGCTGACTATCCGGGTCGGCTGGTACTGAGTTGCATCTGTCGGGCAAACCTCCATTGATGGCAGGCGCTTTCGACGTGCA     | 120  |
| 3rd Cell | 1    | ATGGGCTCCAGACCTTCTACCAAGAACCAGCACCTATGATGCTGACTATCCGGGTCGGCTGGTACTGAGTTGCATCTGTCGGGCAAACCTCCATTGATGGCAGGCGCTTTCGACGTGCA     | 120  |
| Plasmid  | 121  | GGAATTGTGGTTACAGGAGACAAAGCAGTCAACATATACACCTCATCCCAGACAGGATCAATCATAGTTAAGCTCCTCCCGAATCTGCCAAGGATAAGGAGGCATGTGCGAAAGCCCC      | 240  |
| Egg      | 121  | GGAATTGTGGTTACAGGAGACAAAGCAGTCAACATATACACCTCATCCCAGACAGGATCAATCATAGTTAAGCTCCTCCCGAATCTGCCAAGGATAAGGAGGCATGTGCGAAAGCCCC      | 240  |
| 1st Cell | 121  | GGAATTGTGGTTACAGGAGACAAAGCAGTCAACATATACACCTCATCCCAGACAGGATCAATCATAGTTAAGCTCCTCCCGAATCTGCCAAGGATAAGGAGGCATGTGCGAAAGCCCC      | 240  |
| 2nd Cell | 121  | GGAATTGTGGTTACAGGAGACAAAGCAGTCAACATATACACCTCATCCCAGACAGGATCAATCATAGTTAAGCTCCTCCCGAATCTGCCAAGGATAAGGAGGCATGTGCGAAAGCCCC      | 240  |
| 3rd Cell | 121  | GGAATTGTGGTTACAGGAGACAAAGCAGTCAACATATACACCTCATCCCAGACAGGATCAATCATAGTTAAGCTCCTCCCGAATCTGCCAAGGATAAGGAGGCATGTGCGAAAGCCCC      | 240  |
| Plasmid  | 241  | TTGGATGCATACAAACAGGACATTGACCACCTTGTCTACCCCCCTTGGTGACTCTATCCGTAGGATACAAGAGCTGTGACTACATCTGGAGGGGGGAGACAGGGGCGCCTTATAGGCGCC    | 360  |
| Egg      | 241  | TTGGATGCATACAAACAGGACATTGACCACCTTGTCTACCCCCCTTGGTGACTCTATCCGTAGGATACAAGAGCTGTGACTACATCTGGAGGGGGGAGACAGGGGCGCCTTATAGGCGCC    | 360  |
| 1st Cell | 241  | TTGGATGCATACAAACAGGACATTGACCACCTTGTCTACCCCCCTTGGTGACTCTATCCGTAGGATACAAGAGCTGTGACTACATCTGGAGGGGGGAGACAGGGGCGCCTTATAGGCGCC    | 360  |
| 2nd Cell | 241  | TTGGATGCATACAAACAGGACATTGACCACCTTGTCTACCCCCCTTGGTGACTCTATCCGTAGGATACAAGAGCTGTGACTACATCTGGAGGGGGGAGACAGGGGCGCCTTATAGGCGCC    | 360  |
| 3rd Cell | 241  | TTGGATGCATACAAACAGGACATTGACCACCTTGTCTACCCCCCTTGGTGACTCTATCCGTAGGATACAAGAGCTGTGACTACATCTGGAGGGGGGAGACAGGGGCGCCTTATAGGCGCC    | 360  |
| Plasmid  | 361  | ATTATTGGCGGTGTGGCTCTTGGGGTTGCAACTGCCGCACAAATAACAGCGGGCGCAGCTGTGATACAAGCGAAACAAATGCTGCCAACATCTCCGACTTAAAGAGAGCATTGCGCGA      | 480  |
| Egg      | 361  | ATTATTGGCGGTGTGGCTCTTGGGGTTGCAACTGCCGCACAAATAACAGCGGGCGCAGCTGTGATACAAGCGAAACAAATGCTGCCAACATCTCCGACTTAAAGAGAGCATTGCGCGA      | 480  |
| 1st Cell | 361  | ATTATTGGCGGTGTGGCTCTTGGGGTTGCAACTGCCGCACAAATAACAGCGGGCGCAGCTGTGATACAAGCGAAACAAATGCTGCCAACATCTCCGACTTAAAGAGAGCATTGCGCGA      | 480  |
| 2nd Cell | 361  | ATTATTGGCGGTGTGGCTCTTGGGGTTGCAACTGCCGCACAAATAACAGCGGGCGCAGCTGTGATACAAGCGAAACAAATGCTGCCAACATCTCCGACTTAAAGAGAGCATTGCGCGA      | 480  |
| 3rd Cell | 361  | ATTATTGGCGGTGTGGCTCTTGGGGTTGCAACTGCCGCACAAATAACAGCGGGCGCAGCTGTGATACAAGCGAAACAAATGCTGCCAACATCTCCGACTTAAAGAGAGCATTGCGCGA      | 480  |
| Plasmid  | 481  | ACCAATGAGGCTGTGCATGAGGTCACTGACGGATTATCGCAACTAGCAGTGGCAGTTGGGAAGATGCAGCAGTTTGTTAATGACCAATTTAATAAAACAGCTCAGGAATTAGACTGCATC    | 600  |
| Egg      | 481  | ACCAATGAGGCTGTGCATGAGGTCACTGACGGATTATCGCAACTAGCAGTGGCAGTTGGGAAGATGCAGCAGTTTGTTAATGACCAATTTAATAAAACAGCTCAGGAATTAGACTGCATC    | 600  |
| 1st Cell | 481  | ACCAATGAGGCTGTGCATGAGGTCACTGACGGATTATCGCAACTAGCAGTGGCAGTTGGGAAGATGCAGCAGTTTGTTAATGACCAATTTAATAAAACAGCTCAGGAATTAGACTGCATC    | 600  |
| 2nd Cell | 481  | ACCAATGAGGCTGTGCATGAGGTCACTGACGGATTATCGCAACTAGCAGTGGCAGTTGGGAAGATGCAGCAGTTTGTTAATGACCAATTTAATAAAACAGCTCAGGAATTAGACTGCATC    | 600  |
| 3rd Cell | 481  | ACCAATGAGGCTGTGCATGAGGTCACTGACGGATTATCGCAACTAGCAGTGGCAGTTGGGAAGATGCAGCAGTTTGTTAATGACCAATTTAATAAAACAGCTCAGGAATTAGACTGCATC    | 600  |
| Plasmid  | 601  | AAAATTGCACAGCAAGTTGGTGATAGAGCTCAACCTGTACCTTAACCGAATTGACTACAGATTTCGGACCACAAATCACTTCACCTGCCTTAAACAGCTGACTATTAGCAGCACTTTACAAT  | 720  |
| Egg      | 601  | AAAATTGCACAGCAAGTTGGTGATAGAGCTCAACCTGTACCTTAACCGAATTGACTACAGATTTCGGACCACAAATCACTTCACCTGCCTTAAACAGCTGACTATTAGCAGCACTTTACAAT  | 720  |
| 1st Cell | 601  | AAAATTGCACAGCAAGTTGGTGATAGAGCTCAACCTGTACCTTAACCGAATTGACTACAGATTTCGGACCACAAATCACTTCACCTGCCTTAAACAGCTGACTATTAGCAGCACTTTACAAT  | 720  |
| 2nd Cell | 601  | AAAATTGCACAGCAAGTTGGTGATAGAGCTCAACCTGTACCTTAACCGAATTGACTACAGATTTCGGACCACAAATCACTTCACCTGCCTTAAACAGCTGACTATTAGCAGCACTTTACAAT  | 720  |
| 3rd Cell | 601  | AAAATTGCACAGCAAGTTGGTGATAGAGCTCAACCTGTACCTTAACCGAATTGACTACAGATTTCGGACCACAAATCACTTCACCTGCCTTAAACAGCTGACTATTAGCAGCACTTTACAAT  | 720  |
| Plasmid  | 721  | CTAGCTGGTGGGAATATGGATTACTTATTGACTAAGTTAGGTATAGGGAACAATCAACTCAGCTCATTAAATCGGTAGCGGCTTAATCACCGGTAACCTATTCTATACGACTCACAGACT    | 840  |
| Egg      | 721  | CTAGCTGGTGGGAATATGGATTACTTATTGACTAAGTTAGGTATAGGGAACAATCAACTCAGCTCATTAAATCGGTAGCGGCTTAATCACCGGTAACCTATTCTATACGACTCACAGACT    | 840  |
| 1st Cell | 721  | CTAGCTGGTGGGAATATGGATTACTTATTGACTAAGTTAGGTATAGGGAACAATCAACTCAGCTCATTAAATCGGTAGCGGCTTAATCACCGGTAACCTATTCTATACGACTCACAGACT    | 840  |
| 2nd Cell | 721  | CTAGCTGGTGGGAATATGGATTACTTATTGACTAAGTTAGGTATAGGGAACAATCAACTCAGCTCATTAAATCGGTAGCGGCTTAATCACCGGTAACCTATTCTATACGACTCACAGACT    | 840  |
| 3rd Cell | 721  | CTAGCTGGTGGGAATATGGATTACTTATTGACTAAGTTAGGTATAGGGAACAATCAACTCAGCTCATTAAATCGGTAGCGGCTTAATCACCGGTAACCTATTCTATACGACTCACAGACT    | 840  |
| Plasmid  | 841  | CAACTCTTGGGTATACAGTAACCTTCACTTCAGTCGGGAACCTAAATAATATGCGTGCCACCTACTTGGAAACCTTATCCGTAAGCACAACACAGGGGATTTCGCTCGGCACCTTGTCCCA   | 960  |
| Egg      | 841  | CAACTCTTGGGTATACAGTAACCTTCACTTCAGTCGGGAACCTAAATAATATGCGTGCCACCTACTTGGAAACCTTATCCGTAAGCACAACACAGGGGATTTCGCTCGGCACCTTGTCCCA   | 960  |
| 1st Cell | 841  | CAACTCTTGGGTATACAGTAACCTTCACTTCAGTCGGGAACCTAAATAATATGCGTGCCACCTACTTGGAAACCTTATCCGTAAGCACAACACAGGGGATTTCGCTCGGCACCTTGTCCCA   | 960  |
| 2nd Cell | 841  | CAACTCTTGGGTATACAGTAACCTTCACTTCAGTCGGGAACCTAAATAATATGCGTGCCACCTACTTGGAAACCTTATCCGTAAGCACAACACAGGGGATTTCGCTCGGCACCTTGTCCCA   | 960  |
| 3rd Cell | 841  | CAACTCTTGGGTATACAGTAACCTTCACTTCAGTCGGGAACCTAAATAATATGCGTGCCACCTACTTGGAAACCTTATCCGTAAGCACAACACAGGGGATTTCGCTCGGCACCTTGTCCCA   | 960  |
| Plasmid  | 961  | AAAGTGGTGACACAGGTGCGTTCTGTGATAGAAGAACTTGACACCTCATACTGTATAGAACTGACTTAGATTTATATTGTACAGAAGATAGTAACGTTCCCTATGTCCTCGTGGTATTAT    | 1080 |
| Egg      | 961  | AAAGTGGTGACACAGGTGCGTTCTGTGATAGAAGAACTTGACACCTCATACTGTATAGAACTGACTTAGATTTATATTGTACAGAAGATAGTAACGTTCCCTATGTCCTCGTGGTATTAT    | 1080 |
| 1st Cell | 961  | AAAGTGGTGACACAGGTGCGTTCTGTGATAGAAGAACTTGACACCTCATACTGTATAGAACTGACTTAGATTTATATTGTACAGAAGATAGTAACGTTCCCTATGTCCTCGTGGTATTAT    | 1080 |
| 2nd Cell | 961  | AAAGTGGTGACACAGGTGCGTTCTGTGATAGAAGAACTTGACACCTCATACTGTATAGAACTGACTTAGATTTATATTGTACAGAAGATAGTAACGTTCCCTATGTCCTCGTGGTATTAT    | 1080 |
| 3rd Cell | 961  | AAAGTGGTGACACAGGTGCGTTCTGTGATAGAAGAACTTGACACCTCATACTGTATAGAACTGACTTAGATTTATATTGTACAGAAGATAGTAACGTTCCCTATGTCCTCGTGGTATTAT    | 1080 |
| Plasmid  | 1081 | TCTCGTTTGAGCGGCAATACATCGGCCTGTATGTACTCAAAGACCGAAGGCGCACTTACTACACCATATATGACTATCAAAGGCTCAGTCATCGCTAAGTCAAGATGACAAACATGTAGA    | 1200 |
| Egg      | 1081 | TCTCGTTTGAGCGGCAATACATCGGCCTGTATGTACTCAAAGACCGAAGGCGCACTTACTACACCATATATGACTATCAAAGGCTCAGTCATCGCTAAGTCAAGATGACAAACATGTAGA    | 1200 |
| 1st Cell | 1081 | TCTCGTTTGAGCGGCAATACATCGGCCTGTATGTACTCAAAGACCGAAGGCGCACTTACTACACCATATATGACTATCAAAGGCTCAGTCATCGCTAAGTCAAGATGACAAACATGTAGA    | 1200 |
| 2nd Cell | 1081 | TCTCGTTTGAGCGGCAATACATCGGCCTGTATGTACTCAAAGACCGAAGGCGCACTTACTACACCATATATGACTATCAAAGGCTCAGTCATCGCTAAGTCAAGATGACAAACATGTAGA    | 1200 |
| 3rd Cell | 1081 | TCTCGTTTGAGCGGCAATACATCGGCCTGTATGTACTCAAAGACCGAAGGCGCACTTACTACACCATATATGACTATCAAAGGCTCAGTCATCGCTAAGTCAAGATGACAAACATGTAGA    | 1200 |
| Plasmid  | 1201 | TGTGTAAACCCCCCGGTATCATATCGCAAAACTATGGAGAAGCCGTGTCTCTAATAGATAAAACATCATGCAATGTTTTATCCTTAGCGGGGATAACTTTAAGGCTCAGTGGGGAATTC     | 1320 |
| Egg      | 1201 | TGTGTAAACCCCCCGGTATCATATCGCAAAACTATGGAGAAGCCGTGTCTCTAATAGATAAAACATCATGCAATGTTTTATCCTTAGCGGGGATAACTTTAAGGCTCAGTGGGGAATTC     | 1320 |
| 1st Cell | 1201 | TGTGTAAACCCCCCGGTATCATATCGCAAAACTATGGAGAAGCCGTGTCTCTAATAGATAAAACATCATGCAATGTTTTATCCTTAGCGGGGATAACTTTAAGGCTCAGTGGGGAATTC     | 1320 |
| 2nd Cell | 1201 | TGTGTAAACCCCCCGGTATCATATCGCAAAACTATGGAGAAGCCGTGTCTCTAATAGATAAAACATCATGCAATGTTTTATCCTTAGCGGGGATAACTTTAAGGCTCAGTGGGGAATTC     | 1320 |
| 3rd Cell | 1201 | TGTGTAAACCCCCCGGTATCATATCGCAAAACTATGGAGAAGCCGTGTCTCTAATAGATAAAACATCATGCAATGTTTTATCCTTAGCGGGGATAACTTTAAGGCTCAGTGGGGAATTC     | 1320 |
| Plasmid  | 1321 | GATGTAACCTTATCAGAAGAAATATCTCAATACAAGATTCTCAAGTAATAATAACAGGCAATCTTGATATCTCAACTGAGCTTGGGAATGTCAACAACCTCGATCAGTAATGCTTTGAATAAG | 1440 |
| Egg      | 1321 | GATGTAACCTTATCAGAAGAAATATCTCAATACAAGATTCTCAAGTAATAATAACAGGCAATCTTGATATCTCAACTGAGCTTGGGAATGTCAACAACCTCGATCAGTAATGCTTTGAATAAG | 1440 |
| 1st Cell | 1321 | GATGTAACCTTATCAGAAGAAATATCTCAATACAAGATTCTCAAGTAATAATAACAGGCAATCTTGATATCTCAACTGAGCTTGGGAATGTCAACAACCTCGATCAGTAATGCTTTGAATAAG | 1440 |
| 2nd Cell | 1321 | GATGTAACCTTATCAGAAGAAATATCTCAATACAAGATTCTCAAGTAATAATAACAGGCAATCTTGATATCTCAACTGAGCTTGGGAATGTCAACAACCTCGATCAGTAATGCTTTGAATAAG | 1440 |
| 3rd Cell | 1321 | GATGTAACCTTATCAGAAGAAATATCTCAATACAAGATTCTCAAGTAATAATAACAGGCAATCTTGATATCTCAACTGAGCTTGGGAATGTCAACAACCTCGATCAGTAATGCTTTGAATAAG | 1440 |
| Plasmid  | 1441 | TTAGAGGAAAGCAACAGAAAACTAGACAAAGTCAATGTCAAACCTGACGACACATCTGCTCTCATACCTATATCGTTTTGACTATCATATCTTGTTTTTGGTGATACTTAGCCTGATT      | 1560 |
| Egg      | 1441 | TTAGAGGAAAGCAACAGAAAACTAGACAAAGTCAATGTCAAACCTGACGACACATCTGCTCTCATACCTATATCGTTTTGACTATCATATCTCTTGTTTTTGGTGATACTTAGCCTGATT    | 1560 |
| 1st Cell | 1441 | TTAGAGGAAAGCAACAGAAAACTAGACAAAGTCAATGTCAAACCTGACGACACATCTGCTCTCATACCTATATCGTTTTGACTATCATATCTCTTGTTTTTGGTGATACTTAGCCTGATT    | 1560 |
| 2nd Cell | 1441 | TTAGAGGAAAGCAACAGAAAACTAGACAAAGTCAATGTCAAACCTGACGACACATCTGCTCTCATACCTATATCGTTTTGACTATCATATCTCTTGTTTTTGGTGATACTTAGCCTGATT    | 1560 |
| 3rd Cell | 1441 | TTAGAGGAAAGCAACAGAAAACTAGACAAAGTCAATGTCAAACCTGACGACACATCTGCTCTCATACCTATATCGTTTTGACTATCATATCTCTTGTTTTTGGTGATACTTAGCCTGATT    | 1560 |
| Plasmid  | 1561 | CTAGCATGCTACCTAATGTACAAGCAAAAGGCGCAACAAAAGACCTTATTATGGCTTGGGAATAATACCTAGATCAGATGAGAGGCCACTACAAAATGTGA                       | 1662 |
| Egg      | 1561 | CTAGCATGCTACCTAATGTACAAGCAAAAGGCGCAACAAAAGACCTTATTATGGCTTGGGAATAATACCTAGATCAGATGAGAGGCCACTACAAAATGTGA                       | 1662 |
| 1st Cell | 1561 | CTAGCATGCTACCTAATGTACAAGCAAAAGGCGCAACAAAAGACCTTATTATGGCTTGGGAATAATACCTAGATCAGATGAGAGGCCACTACAAAATGTGA                       | 1662 |
| 2nd Cell | 1561 | CTAGCATGCTACCTAATGTACAAGCAAAAGGCGCAACAAAAGACCTTATTATGGCTTGGGAATAATACCTAGATCAGATGAGAGGCCACTACAAAATGTGA                       | 1662 |
| 3rd Cell | 1561 | CTAGCATGCTACCTAATGTACAAGCAAAAGGCGCAACAAAAGACCTTATTATGGCTTGGGAATAATACCTAGATCAGATGAGAGGCCACTACAAAATGTGA                       | 1662 |

Plasmid : Plasmids for rescue experiments  
 Egg : Viruses were propagated in embryonated eggs  
 1st Cell :  
 2nd Cell :  
 3rd Cell :  
 Each passage viruses in HEp-2 cells

## rNDV-2HN (APMV-2 HN gene)

|          |      |                                                                                                                            |      |
|----------|------|----------------------------------------------------------------------------------------------------------------------------|------|
| Plasmid  | 1    | ATGGATTTCCCATCTAGGGAGAACCTGGCAGCAGGTGACATATCGGGGCGGAAGACTTGGAGATTACTGTTCGGGATCTCCACATTGAGCATAGGTGTGGTCTGTCTTGCCATCAATATT   | 120  |
| Egg      | 1    | ATGGATTTCCCATCTAGGGAGAACCTGGCAGCAGGTGACATATCGGGGCGGAAGACTTGGAGATTACTGTTCGGGATCTCCACATTGAGCATAGGTGTGGTCTGTCTTGCCATCAATATT   | 120  |
| 1st Cell | 1    | ATGGATTTCCCATCTAGGGAGAACCTGGCAGCAGGTGACATATCGGGGCGGAAGACTTGGAGATTACTGTTCGGGATCTCCACATTGAGCATAGGTGTGGTCTGTCTTGCCATCAATATT   | 120  |
| 2nd Cell | 1    | ATGGATTTCCCATCTAGGGAGAACCTGGCAGCAGGTGACATATCGGGGCGGAAGACTTGGAGATTACTGTTCGGGATCTCCACATTGAGCATAGGTGTGGTCTGTCTTGCCATCAATATT   | 120  |
| 3rd Cell | 1    | ATGGATTTCCCATCTAGGGAGAACCTGGCAGCAGGTGACATATCGGGGCGGAAGACTTGGAGATTACTGTTCGGGATCTCCACATTGAGCATAGGTGTGGTCTGTCTTGCCATCAATATT   | 120  |
| Plasmid  | 121  | GCCACAATTGCAAAATTTGGATCACCTGGATAACATGGCTTCGAACACATGGACAACAACCTGAGGCTGACCGTGTGATATCAGCATCAGCACTCGCTCAAAGTCCCTGTCAACCAGATT   | 240  |
| Egg      | 121  | GCCACAATTGCAAAATTTGGATCACCTGGATAACATGGCTTCGAACACATGGACAACAACCTGAGGCTGACCGTGTGATATCAGCATCAGCACTCGCTCAAAGTCCCTGTCAACCAGATT   | 240  |
| 1st Cell | 121  | GCCACAATTGCAAAATTTGGATCACCTGGATAACATGGCTTCGAACACATGGACAACAACCTGAGGCTGACCGTGTGATATCAGCATCAGCACTCGCTCAAAGTCCCTGTCAACCAGATT   | 240  |
| 2nd Cell | 121  | GCCACAATTGCAAAATTTGGATCACCTGGATAACATGGCTTCGAACACATGGACAACAACCTGAGGCTGACCGTGTGATATCAGCATCAGCACTCGCTCAAAGTCCCTGTCAACCAGATT   | 240  |
| 3rd Cell | 121  | GCCACAATTGCAAAATTTGGATCACCTGGATAACATGGCTTCGAACACATGGACAACAACCTGAGGCTGACCGTGTGATATCAGCATCAGCACTCGCTCAAAGTCCCTGTCAACCAGATT   | 240  |
| Plasmid  | 241  | AATGACATGTTTCGGATTGTAGCGCTTGACCTACCTCTGCAGATGACATCATTACAGAAAGAACAGCATCCCAAGTCGGGTCTTGCGTGAAAGTATCAACAATGTTTTATCCAAGAA      | 360  |
| Egg      | 241  | AATGACATGTTTCGGATTGTAGCGCTTGACCTACCTCTGCAGATGACATCATTACAGAAAGAACAGCATCCCAAGTCGGGTCTTGCGTGAAAGTATCAACAATGTTTTATCCAAGAA      | 360  |
| 1st Cell | 241  | AATGACATGTTTCGGATTGTAGCGCTTGACCTACCTCTGCAGATGACATCATTACAGAAAGAACAGCATCCCAAGTCGGGTCTTGCGTGAAAGTATCAACAATGTTTTATCCAAGAA      | 360  |
| 2nd Cell | 241  | AATGACATGTTTCGGATTGTAGCGCTTGACCTACCTCTGCAGATGACATCATTACAGAAAGAACAGCATCCCAAGTCGGGTCTTGCGTGAAAGTATCAACAATGTTTTATCCAAGAA      | 360  |
| 3rd Cell | 241  | AATGACATGTTTCGGATTGTAGCGCTTGACCTACCTCTGCAGATGACATCATTACAGAAAGAACAGCATCCCAAGTCGGGTCTTGCGTGAAAGTATCAACAATGTTTTATCCAAGAA      | 360  |
| Plasmid  | 361  | GGATCTGCAGGCTGGTCTTGTGAATGACCTGAATATCGAGGGGGATCGCTGTACGTTGTACCAAGGAGATGCATTCGAGGCCATAATTTCCAGGCCATTTCTTAATAGAACAT          | 480  |
| Egg      | 361  | GGATCTGCAGGCTGGTCTTGTGAATGACCTGAATATCGAGGGGGATCGCTGTACGTTGTACCAAGGAGATGCATTCGAGGCCATAATTTCCAGGCCATTTCTTAATAGAACAT          | 480  |
| 1st Cell | 361  | GGATCTGCAGGCTGGTCTTGTGAATGACCTGAATATCGAGGGGGATCGCTGTACGTTGTACCAAGGAGATGCATTCGAGGCCATAATTTCCAGGCCATTTCTTAATAGAACAT          | 480  |
| 2nd Cell | 361  | GGATCTGCAGGCTGGTCTTGTGAATGACCTGAATATCGAGGGGGATCGCTGTACGTTGTACCAAGGAGATGCATTCGAGGCCATAATTTCCAGGCCATTTCTTAATAGAACAT          | 480  |
| 3rd Cell | 361  | GGATCTGCAGGCTGGTCTTGTGAATGACCTGAATATCGAGGGGGATCGCTGTACGTTGTACCAAGGAGATGCATTCGAGGCCATAATTTCCAGGCCATTTCTTAATAGAACAT          | 480  |
| Plasmid  | 481  | CCAAGTTTTGTCCTGGTCTACTACTGCTAAGGGCTGTATAAGGATCCCGACCTTCCATATGGGCCCTTCACATTGGTGTACTACATACATCATTGCATCAGGTTGCCAGGATGCG        | 600  |
| Egg      | 481  | CCAAGTTTTGTCCTGGTCTACTACTGCTAAGGGCTGTATAAGGATCCCGACCTTCCATATGGGCCCTTCACATTGGTGTACTACATACATCATTGCATCAGGTTGCCAGGATGCG        | 600  |
| 1st Cell | 481  | CCAAGTTTTGTCCTGGTCTACTACTGCTAAGGGCTGTATAAGGATCCCGACCTTCCATATGGGCCCTTCACATTGGTGTACTACATACATCATTGCATCAGGTTGCCAGGATGCG        | 600  |
| 2nd Cell | 481  | CCAAGTTTTGTCCTGGTCTACTACTGCTAAGGGCTGTATAAGGATCCCGACCTTCCATATGGGCCCTTCACATTGGTGTACTACATACATCATTGCATCAGGTTGCCAGGATGCG        | 600  |
| 3rd Cell | 481  | CCAAGTTTTGTCCTGGTCTACTACTGCTAAGGGCTGTATAAGGATCCCGACCTTCCATATGGGCCCTTCACATTGGTGTACTACATACATCATTGCATCAGGTTGCCAGGATGCG        | 600  |
| Plasmid  | 601  | AGCCATCCAGTATGTATATCTCTCTGGGGTGTCTGAAAGCATCGCAGCCGGGTGCGCTATCTTCTTGACAACGGCCAGCCAGCTCGTGGATGACAACATCAACCGGAAGTCATGCAGC     | 720  |
| Egg      | 601  | AGCCATCCAGTATGTATATCTCTCTGGGGTGTCTGAAAGCATCGCAGCCGGGTGCGCTATCTTCTTGACAACGGCCAGCCAGCTCGTGGATGACAACATCAACCGGAAGTCATGCAGC     | 720  |
| 1st Cell | 601  | AGCCATCCAGTATGTATATCTCTCTGGGGTGTCTGAAAGCATCGCAGCCGGGTGCGCTATCTTCTTGACAACGGCCAGCCAGCTCGTGGATGACAACATCAACCGGAAGTCATGCAGC     | 720  |
| 2nd Cell | 601  | AGCCATCCAGTATGTATATCTCTCTGGGGTGTCTGAAAGCATCGCAGCCGGGTGCGCTATCTTCTTGACAACGGCCAGCCAGCTCGTGGATGACAACATCAACCGGAAGTCATGCAGC     | 720  |
| 3rd Cell | 601  | AGCCATCCAGTATGTATATCTCTCTGGGGTGTCTGAAAGCATCGCAGCCGGGTGCGCTATCTTCTTGACAACGGCCAGCCAGCTCGTGGATGACAACATCAACCGGAAGTCATGCAGC     | 720  |
| Plasmid  | 721  | ATCGTAGCCTCAAAATACGTTGTGATATCCTATGCAGTATTGTGATTGAAACAGAGGATGAGGATTATAGGTTGATCCGGCTACTAGCATGATTATAGGTAGGCTGTTCTTCAACGGG     | 840  |
| Egg      | 721  | ATCGTAGCCTCAAAATACGTTGTGATATCCTATGCAGTATTGTGATTGAAACAGAGGATGAGGATTATAGGTTGATCCGGCTACTAGCATGATTATAGGTAGGCTGTTCTTCAACGGG     | 840  |
| 1st Cell | 721  | ATCGTAGCCTCAAAATACGTTGTGATATCCTATGCAGTATTGTGATTGAAACAGAGGATGAGGATTATAGGTTGATCCGGCTACTAGCATGATTATAGGTAGGCTGTTCTTCAACGGG     | 840  |
| 2nd Cell | 721  | ATCGTAGCCTCAAAATACGTTGTGATATCCTATGCAGTATTGTGATTGAAACAGAGGATGAGGATTATAGGTTGATCCGGCTACTAGCATGATTATAGGTAGGCTGTTCTTCAACGGG     | 840  |
| 3rd Cell | 721  | ATCGTAGCCTCAAAATACGTTGTGATATCCTATGCAGTATTGTGATTGAAACAGAGGATGAGGATTATAGGTTGATCCGGCTACTAGCATGATTATAGGTAGGCTGTTCTTCAACGGG     | 840  |
| Plasmid  | 841  | TCATACACAGAGAGCAAGATTAAACACAGGGTCCATCTTCAGTCTATTCTCTGCTAATACCTCGCGTGGGTGCGGTATTGTAGTCGGGGATGAAGCCGCATTCCCAATATATGGTGGG     | 960  |
| Egg      | 841  | TCATACACAGAGAGCAAGATTAAACACAGGGTCCATCTTCAGTCTATTCTCTGCTAATACCTCGCGTGGGTGCGGTATTGTAGTCGGGGATGAAGCCGCATTCCCAATATATGGTGGG     | 960  |
| 1st Cell | 841  | TCATACACAGAGAGCAAGATTAAACACAGGGTCCATCTTCAGTCTATTCTCTGCTAATACCTCGCGTGGGTGCGGTATTGTAGTCGGGGATGAAGCCGCATTCCCAATATATGGTGGG     | 960  |
| 2nd Cell | 841  | TCATACACAGAGAGCAAGATTAAACACAGGGTCCATCTTCAGTCTATTCTCTGCTAATACCTCGCGTGGGTGCGGTATTGTAGTCGGGGATGAAGCCGCATTCCCAATATATGGTGGG     | 960  |
| 3rd Cell | 841  | TCATACACAGAGAGCAAGATTAAACACAGGGTCCATCTTCAGTCTATTCTCTGCTAATACCTCGCGTGGGTGCGGTATTGTAGTCGGGGATGAAGCCGCATTCCCAATATATGGTGGG     | 960  |
| Plasmid  | 961  | GTCACGAGCAACACATGGTTGTTTCAACAGCTCAAGGATTTTGGTTACTTCAACCATAATGATGTGTACAAGTGAATCGCAATCGGATGATATACAGCAAACTCTCGGATGCATACAGGCCA | 1080 |
| Egg      | 961  | GTCACGAGCAACACATGGTTGTTTCAACAGCTCAAGGATTTTGGTTACTTCAACCATAATGATGTGTACAAGTGAATCGCAATCGGATGATATACAGCAAACTCTCGGATGCATACAGGCCA | 1080 |
| 1st Cell | 961  | GTCACGAGCAACACATGGTTGTTTCAACAGCTCAAGGATTTTGGTTACTTCAACCATAATGATGTGTACAAGTGAATCGCAATCGGATGATATACAGCAAACTCTCGGATGCATACAGGCCA | 1080 |
| 2nd Cell | 961  | GTCACGAGCAACACATGGTTGTTTCAACAGCTCAAGGATTTTGGTTACTTCAACCATAATGATGTGTACAAGTGAATCGCAATCGGATGATATACAGCAAACTCTCGGATGCATACAGGCCA | 1080 |
| 3rd Cell | 961  | GTCACGAGCAACACATGGTTGTTTCAACAGCTCAAGGATTTTGGTTACTTCAACCATAATGATGTGTACAAGTGAATCGCAATCGGATGATATACAGCAAACTCTCGGATGCATACAGGCCA | 1080 |
| Plasmid  | 1081 | CCTAAATCTCAGGAAGGTTATGGGTACAAGGCATCCTATTGTGCCAGTTTCACTGAGACCTGATCCTGGCTGTCGCTTAAAGTGTTCAATACAGCAATGTGATGATGGGGGAGAA        | 1200 |
| Egg      | 1081 | CCTAAATCTCAGGAAGGTTATGGGTACAAGGCATCCTATTGTGCCAGTTTCACTGAGACCTGATCCTGGCTGTCGCTTAAAGTGTTCAATACAGCAATGTGATGATGGGGGAGAA        | 1200 |
| 1st Cell | 1081 | CCTAAATCTCAGGAAGGTTATGGGTACAAGGCATCCTATTGTGCCAGTTTCACTGAGACCTGATCCTGGCTGTCGCTTAAAGTGTTCAATACAGCAATGTGATGATGGGGGAGAA        | 1200 |
| 2nd Cell | 1081 | CCTAAATCTCAGGAAGGTTATGGGTACAAGGCATCCTATTGTGCCAGTTTCACTGAGACCTGATCCTGGCTGTCGCTTAAAGTGTTCAATACAGCAATGTGATGATGGGGGAGAA        | 1200 |
| 3rd Cell | 1081 | CCTAAATCTCAGGAAGGTTATGGGTACAAGGCATCCTATTGTGCCAGTTTCACTGAGACCTGATCCTGGCTGTCGCTTAAAGTGTTCAATACAGCAATGTGATGATGGGGGAGAA        | 1200 |
| Plasmid  | 1201 | GCGAGGTTGATCCAAGTAGGCTCAACCGTGATCTATACCAACGCTCATCCTCATGGTGGGTGGTAGGACTGACTTACAATATAGATGTGTGAGAATAACTTCACAGACAGGTAACACA     | 1320 |
| Egg      | 1201 | GCGAGGTTGATCCAAGTAGGCTCAACCGTGATCTATACCAACGCTCATCCTCATGGTGGGTGGTAGGACTGACTTACAATATAGATGTGTGAGAATAACTTCACAGACAGGTAACACA     | 1320 |
| 1st Cell | 1201 | GCGAGGTTGATCCAAGTAGGCTCAACCGTGATCTATACCAACGCTCATCCTCATGGTGGGTGGTAGGACTGACTTACAATATAGATGTGTGAGAATAACTTCACAGACAGGTAACACA     | 1320 |
| 2nd Cell | 1201 | GCGAGGTTGATCCAAGTAGGCTCAACCGTGATCTATACCAACGCTCATCCTCATGGTGGGTGGTAGGACTGACTTACAATATAGATGTGTGAGAATAACTTCACAGACAGGTAACACA     | 1320 |
| 3rd Cell | 1201 | GCGAGGTTGATCCAAGTAGGCTCAACCGTGATCTATACCAACGCTCATCCTCATGGTGGGTGGTAGGACTGACTTACAATATAGATGTGTGAGAATAACTTCACAGACAGGTAACACA     | 1320 |
| Plasmid  | 1321 | CTCAACCATGTAGACCCCATTTGCCATACAAAGTTCCCAAGACCATTCTTCGGGGAGAGTGCCTGTGCGAGGCCAAACATATGCGCTGCTGTCTGTCTCGGAGTTTATCAGGACATT      | 1440 |
| Egg      | 1321 | CTCAACCATGTAGACCCCATTTGCCATACAAAGTTCCCAAGACCATTCTTCGGGGAGAGTGCCTGTGCGAGGCCAAACATATGCGCTGCTGTCTGTCTCGGAGTTTATCAGGACATT      | 1440 |
| 1st Cell | 1321 | CTCAACCATGTAGACCCCATTTGCCATACAAAGTTCCCAAGACCATTCTTCGGGGAGAGTGCCTGTGCGAGGCCAAACATATGCGCTGCTGTCTGTCTCGGAGTTTATCAGGACATT      | 1440 |
| 2nd Cell | 1321 | CTCAACCATGTAGACCCCATTTGCCATACAAAGTTCCCAAGACCATTCTTCGGGGAGAGTGCCTGTGCGAGGCCAAACATATGCGCTGCTGTCTGTCTCGGAGTTTATCAGGACATT      | 1440 |
| 3rd Cell | 1321 | CTCAACCATGTAGACCCCATTTGCCATACAAAGTTCCCAAGACCATTCTTCGGGGAGAGTGCCTGTGCGAGGCCAAACATATGCGCTGCTGTCTGTCTCGGAGTTTATCAGGACATT      | 1440 |
| Plasmid  | 1441 | TGGCCGATCAGTACAGCCACCAATAACAGCAACATTGTGGTGGTGGACAGTACTTAGAAGCATCTTATTCAGGAAATACCCAAGAATAGGGATAGCAACCCAGTATGAGTGGAAAGTC     | 1560 |
| Egg      | 1441 | TGGCCGATCAGTACAGCCACCAATAACAGCAACATTGTGGTGGTGGACAGTACTTAGAAGCATCTTATTCAGGAAATACCCAAGAATAGGGATAGCAACCCAGTATGAGTGGAAAGTC     | 1560 |
| 1st Cell | 1441 | TGGCCGATCAGTACAGCCACCAATAACAGCAACATTGTGGTGGTGGACAGTACTTAGAAGCATCTTATTCAGGAAATACCCAAGAATAGGGATAGCAACCCAGTATGAGTGGAAAGTC     | 1560 |
| 2nd Cell | 1441 | TGGCCGATCAGTACAGCCACCAATAACAGCAACATTGTGGTGGTGGACAGTACTTAGAAGCATCTTATTCAGGAAATACCCAAGAATAGGGATAGCAACCCAGTATGAGTGGAAAGTC     | 1560 |
| 3rd Cell | 1441 | TGGCCGATCAGTACAGCCACCAATAACAGCAACATTGTGGTGGTGGACAGTACTTAGAAGCATCTTATTCAGGAAATACCCAAGAATAGGGATAGCAACCCAGTATGAGTGGAAAGTC     | 1560 |
| Plasmid  | 1561 | ACCAACCAAGCTGTTCAATTGCAATCTGAGGAGGGGTACTCAACCAACAACATGCTTCCGGAACACCAACCGGCAAGGCATATTGTTGATGTATATCAGAGTACGCTGATGGGGTGTTC    | 1680 |
| Egg      | 1561 | ACCAACCAAGCTGTTCAATTGCAATCTGAGGAGGGGTACTCAACCAACAACATGCTTCCGGAACACCAACCGGCAAGGCATATTGTTGATGTATATCAGAGTACGCTGATGGGGTGTTC    | 1680 |
| 1st Cell | 1561 | ACCAACCAAGCTGTTCAATTGCAATCTGAGGAGGGGTACTCAACCAACAACATGCTTCCGGAACACCAACCGGCAAGGCATATTGTTGATGTATATCAGAGTACGCTGATGGGGTGTTC    | 1680 |
| 2nd Cell | 1561 | ACCAACCAAGCTGTTCAATTGCAATCTGAGGAGGGGTACTCAACCAACAACATGCTTCCGGAACACCAACCGGCAAGGCATATTGTTGATGTATATCAGAGTACGCTGATGGGGTGTTC    | 1680 |
| 3rd Cell | 1561 | ACCAACCAAGCTGTTCAATTGCAATCTGAGGAGGGGTACTCAACCAACAACATGCTTCCGGAACACCAACCGGCAAGGCATATTGTTGATGTATATCAGAGTACGCTGATGGGGTGTTC    | 1680 |
| Plasmid  | 1681 | GGATCATACAGGATCGTTCCTCAGCTTATAGAGATTAGAAGCAGCACCCGGTAAATCTGAGTGA                                                           | 1743 |
| Egg      | 1681 | GGATCATACAGGATCGTTCCTCAGCTTATAGAGATTAGAAGCAGCACCCGGTAAATCTGAGTGA                                                           | 1743 |
| 1st Cell | 1681 | GGATCATACAGGATCGTTCCTCAGCTTATAGAGATTAGAAGCAGCACCCGGTAAATCTGAGTGA                                                           | 1743 |
| 2nd Cell | 1681 | GGATCATACAGGATCGTTCCTCAGCTTATAGAGATTAGAAGCAGCACCCGGTAAATCTGAGTGA                                                           | 1743 |
| 3rd Cell | 1681 | GGATCATACAGGATCGTTCCTCAGCTTATAGAGATTAGAAGCAGCACCCGGTAAATCTGAGTGA                                                           | 1743 |

Plasmid : Plasmids for rescue experiments  
 Egg : Viruses were propagated in embryonated eggs  
 1st Cell :  
 2nd Cell :  
 3rd Cell : Each passage viruses in HEp-2 cells

# rNDV-2F/2HN (APMV-2 F gene)

|          |      |                                                                                                                           |      |
|----------|------|---------------------------------------------------------------------------------------------------------------------------|------|
| Plasmid  | 1    | ATGAATCAAGCACTCGTGATTTTGTGGTATCTTCCAGCTCGCGGTTGCCTTAGATAACTCAGTGTGGCTCCAATAGGAGTAGCTAGCGCAGGAGTGGAACCTGGCGGCATATACA       | 120  |
| Egg      | 1    | ATGAATCAAGCACTCGTGATTTTGTGGTATCTTCCAGCTCGCGGTTGCCTTAGATAACTCAGTGTGGCTCCAATAGGAGTAGCTAGCGCAGGAGTGGAACCTGGCGGCATATACA       | 120  |
| 1st Cell | 1    | ATGAATCAAGCACTCGTGATTTTGTGGTATCTTCCAGCTCGCGGTTGCCTTAGATAACTCAGTGTGGCTCCAATAGGAGTAGCTAGCGCAGGAGTGGAACCTGGCGGCATATACA       | 120  |
| 2nd Cell | 1    | ATGAATCAAGCACTCGTGATTTTGTGGTATCTTCCAGCTCGCGGTTGCCTTAGATAACTCAGTGTGGCTCCAATAGGAGTAGCTAGCGCAGGAGTGGAACCTGGCGGCATATACA       | 120  |
| 3rd Cell | 1    | ATGAATCAAGCACTCGTGATTTTGTGGTATCTTCCAGCTCGCGGTTGCCTTAGATAACTCAGTGTGGCTCCAATAGGAGTAGCTAGCGCAGGAGTGGAACCTGGCGGCATATACA       | 120  |
| Plasmid  | 121  | ACGACCCTCACAGGGACCATCGCAGTGAGATTTATCCCGGTCCTGCCTGGGAACCTATCAACATGTGCACAGGAGACGCTGCAGGAATATAATAGAAGTGTGACTAATATCTTAGGCCCG  | 240  |
| Egg      | 121  | ACGACCCTCACAGGGACCATCGCAGTGAGATTTATCCCGGTCCTGCCTGGGAACCTATCAACATGTGCACAGGAGACGCTGCAGGAATATAATAGAAGTGTGACTAATATCTTAGGCCCG  | 240  |
| 1st Cell | 121  | ACGACCCTCACAGGGACCATCGCAGTGAGATTTATCCCGGTCCTGCCTGGGAACCTATCAACATGTGCACAGGAGACGCTGCAGGAATATAATAGAAGTGTGACTAATATCTTAGGCCCG  | 240  |
| 2nd Cell | 121  | ACGACCCTCACAGGGACCATCGCAGTGAGATTTATCCCGGTCCTGCCTGGGAACCTATCAACATGTGCACAGGAGACGCTGCAGGAATATAATAGAAGTGTGACTAATATCTTAGGCCCG  | 240  |
| 3rd Cell | 121  | ACGACCCTCACAGGGACCATCGCAGTGAGATTTATCCCGGTCCTGCCTGGGAACCTATCAACATGTGCACAGGAGACGCTGCAGGAATATAATAGAAGTGTGACTAATATCTTAGGCCCG  | 240  |
| Plasmid  | 241  | TTGAGAGAGAAGTGTGATGCTCTCCTATCTGACTTCGATAAACCTGCATCGAGGTCGTGGGCGCCATTCATTTGGGTCGGTGGCTTGGGGGTAGCAACAGCTGCACAAATCACAGCGCC   | 360  |
| Egg      | 241  | TTGAGAGAGAAGTGTGATGCTCTCCTATCTGACTTCGATAAACCTGCATCGAGGTCGTGGGCGCCATTCATTTGGGTCGGTGGCTTGGGGGTAGCAACAGCTGCACAAATCACAGCGCC   | 360  |
| 1st Cell | 241  | TTGAGAGAGAAGTGTGATGCTCTCCTATCTGACTTCGATAAACCTGCATCGAGGTCGTGGGCGCCATTCATTTGGGTCGGTGGCTTGGGGGTAGCAACAGCTGCACAAATCACAGCGCC   | 360  |
| 2nd Cell | 241  | TTGAGAGAGAAGTGTGATGCTCTCCTATCTGACTTCGATAAACCTGCATCGAGGTCGTGGGCGCCATTCATTTGGGTCGGTGGCTTGGGGGTAGCAACAGCTGCACAAATCACAGCGCC   | 360  |
| 3rd Cell | 241  | TTGAGAGAGAAGTGTGATGCTCTCCTATCTGACTTCGATAAACCTGCATCGAGGTCGTGGGCGCCATTCATTTGGGTCGGTGGCTTGGGGGTAGCAACAGCTGCACAAATCACAGCGCC   | 360  |
| Plasmid  | 361  | GTGGCTCTCAATCAAGCACAAGAGAATGCCCGGAATATATGGCGTCTCAAGGAATCGATAAAGAAAACCAATGAGGCTGTGTTGGAATTGAAGGAAGGACTTGCAACGACTGCTATAGCT  | 480  |
| Egg      | 361  | GTGGCTCTCAATCAAGCACAAGAGAATGCCCGGAATATATGGCGTCTCAAGGAATCGATAAAGAAAACCAATGAGGCTGTGTTGGAATTGAAGGAAGGACTTGCAACGACTGCTATAGCT  | 480  |
| 1st Cell | 361  | GTGGCTCTCAATCAAGCACAAGAGAATGCCCGGAATATATGGCGTCTCAAGGAATCGATAAAGAAAACCAATGAGGCTGTGTTGGAATTGAAGGAAGGACTTGCAACGACTGCTATAGCT  | 480  |
| 2nd Cell | 361  | GTGGCTCTCAATCAAGCACAAGAGAATGCCCGGAATATATGGCGTCTCAAGGAATCGATAAAGAAAACCAATGAGGCTGTGTTGGAATTGAAGGAAGGACTTGCAACGACTGCTATAGCT  | 480  |
| 3rd Cell | 361  | GTGGCTCTCAATCAAGCACAAGAGAATGCCCGGAATATATGGCGTCTCAAGGAATCGATAAAGAAAACCAATGAGGCTGTGTTGGAATTGAAGGAAGGACTTGCAACGACTGCTATAGCT  | 480  |
| Plasmid  | 481  | TTGGACAAAGTGCAAAAGTTTATCAATGATGATATTATACCACAGATTAAGGACATTGACTGCCAGGTAGTTGCAAAATAAATAGGCGTCTACCTCTCCTTATACTTAACAGAGCTTACA  | 600  |
| Egg      | 481  | TTGGACAAAGTGCAAAAGTTTATCAATGATGATATTATACCACAGATTAAGGACATTGACTGCCAGGTAGTTGCAAAATAAATAGGCGTCTACCTCTCCTTATACTTAACAGAGCTTACA  | 600  |
| 1st Cell | 481  | TTGGACAAAGTGCAAAAGTTTATCAATGATGATATTATACCACAGATTAAGGACATTGACTGCCAGGTAGTTGCAAAATAAATAGGCGTCTACCTCTCCTTATACTTAACAGAGCTTACA  | 600  |
| 2nd Cell | 481  | TTGGACAAAGTGCAAAAGTTTATCAATGATGATATTATACCACAGATTAAGGACATTGACTGCCAGGTAGTTGCAAAATAAATAGGCGTCTACCTCTCCTTATACTTAACAGAGCTTACA  | 600  |
| 3rd Cell | 481  | TTGGACAAAGTGCAAAAGTTTATCAATGATGATATTATACCACAGATTAAGGACATTGACTGCCAGGTAGTTGCAAAATAAATAGGCGTCTACCTCTCCTTATACTTAACAGAGCTTACA  | 600  |
| Plasmid  | 601  | ACTGTATTGGTTCTCAGATCACTAATCCTGCATTATCAACGCTCTCTTACCAGGCGCTGTACAGCTTATGTGGAGGGGATATGGGAAAGCTAAGTACGCTGATCGGTGTCAATGCAAA    | 720  |
| Egg      | 601  | ACTGTATTGGTTCTCAGATCACTAATCCTGCATTATCAACGCTCTCTTACCAGGCGCTGTACAGCTTATGTGGAGGGGATATGGGAAAGCTAAGTACGCTGATCGGTGTCAATGCAAA    | 720  |
| 1st Cell | 601  | ACTGTATTGGTTCTCAGATCACTAATCCTGCATTATCAACGCTCTCTTACCAGGCGCTGTACAGCTTATGTGGAGGGGATATGGGAAAGCTAAGTACGCTGATCGGTGTCAATGCAAA    | 720  |
| 2nd Cell | 601  | ACTGTATTGGTTCTCAGATCACTAATCCTGCATTATCAACGCTCTCTTACCAGGCGCTGTACAGCTTATGTGGAGGGGATATGGGAAAGCTAAGTACGCTGATCGGTGTCAATGCAAA    | 720  |
| 3rd Cell | 601  | ACTGTATTGGTTCTCAGATCACTAATCCTGCATTATCAACGCTCTCTTACCAGGCGCTGTACAGCTTATGTGGAGGGGATATGGGAAAGCTAAGTACGCTGATCGGTGTCAATGCAAA    | 720  |
| Plasmid  | 721  | GATGTGGGATCCCTCTACGAGGCTAACCTCATAACCGGCCAAATCGTTGGATATGACCTGAACACAGATAATCCTCATACAAGTATCTTACCAGGAGTGTGCTGAAGTGACAGGAGTC    | 840  |
| Egg      | 721  | GATGTGGGATCCCTCTACGAGGCTAACCTCATAACCGGCCAAATCGTTGGATATGACCTGAACACAGATAATCCTCATACAAGTATCTTACCAGGAGTGTGCTGAAGTGACAGGAGTC    | 840  |
| 1st Cell | 721  | GATGTGGGATCCCTCTACGAGGCTAACCTCATAACCGGCCAAATCGTTGGATATGACCTGAACACAGATAATCCTCATACAAGTATCTTACCAGGAGTGTGCTGAAGTGACAGGAGTC    | 840  |
| 2nd Cell | 721  | GATGTGGGATCCCTCTACGAGGCTAACCTCATAACCGGCCAAATCGTTGGATATGACCTGAACACAGATAATCCTCATACAAGTATCTTACCAGGAGTGTGCTGAAGTGACAGGAGTC    | 840  |
| 3rd Cell | 721  | GATGTGGGATCCCTCTACGAGGCTAACCTCATAACCGGCCAAATCGTTGGATATGACCTGAACACAGATAATCCTCATACAAGTATCTTACCAGGAGTGTGCTGAAGTGACAGGAGTC    | 840  |
| Plasmid  | 841  | CGGGCTACTGAGTTAGTCACTGTCTCAGTGTCTACTACACAAAAGGAGAAGGGCAGGCAATTGTTCCGAGATATGTGGCAGAGTAGAGTGTGACAGAGGAGTTGGATGTCTCGACTTGT   | 960  |
| Egg      | 841  | CGGGCTACTGAGTTAGTCACTGTCTCAGTGTCTACTACACAAAAGGAGAAGGGCAGGCAATTGTTCCGAGATATGTGGCAGAGTAGAGTGTGACAGAGGAGTTGGATGTCTCGACTTGT   | 960  |
| 1st Cell | 841  | CGGGCTACTGAGTTAGTCACTGTCTCAGTGTCTACTACACAAAAGGAGAAGGGCAGGCAATTGTTCCGAGATATGTGGCAGAGTAGAGTGTGACAGAGGAGTTGGATGTCTCGACTTGT   | 960  |
| 2nd Cell | 841  | CGGGCTACTGAGTTAGTCACTGTCTCAGTGTCTACTACACAAAAGGAGAAGGGCAGGCAATTGTTCCGAGATATGTGGCAGAGTAGAGTGTGACAGAGGAGTTGGATGTCTCGACTTGT   | 960  |
| 3rd Cell | 841  | CGGGCTACTGAGTTAGTCACTGTCTCAGTGTCTACTACACAAAAGGAGAAGGGCAGGCAATTGTTCCGAGATATGTGGCAGAGTAGAGTGTGACAGAGGAGTTGGATGTCTCGACTTGT   | 960  |
| Plasmid  | 961  | AGGTTTAGCAAAACAACCTCTTTATTGTAGGTGCATTCTCACACGGGCCCTACCAACTTTGATGCCAGCTGCCTGTGTCAGGGAAGTACGACGATTGTGAGTACACACAGAGATAGGAGCG | 1080 |
| Egg      | 961  | AGGTTTAGCAAAACAACCTCTTTATTGTAGGTGCATTCTCACACGGGCCCTACCAACTTTGATGCCAGCTGCCTGTGTCAGGGAAGTACGACGATTGTGAGTACACACAGAGATAGGAGCG | 1080 |
| 1st Cell | 961  | AGGTTTAGCAAAACAACCTCTTTATTGTAGGTGCATTCTCACACGGGCCCTACCAACTTTGATGCCAGCTGCCTGTGTCAGGGAAGTACGACGATTGTGAGTACACACAGAGATAGGAGCG | 1080 |
| 2nd Cell | 961  | AGGTTTAGCAAAACAACCTCTTTATTGTAGGTGCATTCTCACACGGGCCCTACCAACTTTGATGCCAGCTGCCTGTGTCAGGGAAGTACGACGATTGTGAGTACACACAGAGATAGGAGCG | 1080 |
| 3rd Cell | 961  | AGGTTTAGCAAAACAACCTCTTTATTGTAGGTGCATTCTCACACGGGCCCTACCAACTTTGATGCCAGCTGCCTGTGTCAGGGAAGTACGACGATTGTGAGTACACACAGAGATAGGAGCG | 1080 |
| Plasmid  | 1081 | CTATCTTCGAGATTTCATCACAGTCAATGGTGGAGTCCTTGCAAACTGCAGAGCAATTGTGTGAAGTGTGTCTACCCCGGCATATAATACCACAAAACGACATTGGCTCCGTAAACAGTT  | 1200 |
| Egg      | 1081 | CTATCTTCGAGATTTCATCACAGTCAATGGTGGAGTCCTTGCAAACTGCAGAGCAATTGTGTGAAGTGTGTCTACCCCGGCATATAATACCACAAAACGACATTGGCTCCGTAAACAGTT  | 1200 |
| 1st Cell | 1081 | CTATCTTCGAGATTTCATCACAGTCAATGGTGGAGTCCTTGCAAACTGCAGAGCAATTGTGTGAAGTGTGTCTACCCCGGCATATAATACCACAAAACGACATTGGCTCCGTAAACAGTT  | 1200 |
| 2nd Cell | 1081 | CTATCTTCGAGATTTCATCACAGTCAATGGTGGAGTCCTTGCAAACTGCAGAGCAATTGTGTGAAGTGTGTCTACCCCGGCATATAATACCACAAAACGACATTGGCTCCGTAAACAGTT  | 1200 |
| 3rd Cell | 1081 | CTATCTTCGAGATTTCATCACAGTCAATGGTGGAGTCCTTGCAAACTGCAGAGCAATTGTGTGAAGTGTGTCTACCCCGGCATATAATACCACAAAACGACATTGGCTCCGTAAACAGTT  | 1200 |
| Plasmid  | 1201 | ATTGACTCAAGTATATGCAAGGAAGTTGTCTTAGAGAGTGTGCAGCTTAGGTTAGAAGGAAAGCTGTATCCCAATCTTCTCCAACGTGACAAATTGACCTTTCCCAATCACAACTCA     | 1320 |
| Egg      | 1201 | ATTGACTCAAGTATATGCAAGGAAGTTGTCTTAGAGAGTGTGCAGCTTAGGTTAGAAGGAAAGCTGTATCCCAATCTTCTCCAACGTGACAAATTGACCTTTCCCAATCACAACTCA     | 1320 |
| 1st Cell | 1201 | ATTGACTCAAGTATATGCAAGGAAGTTGTCTTAGAGAGTGTGCAGCTTAGGTTAGAAGGAAAGCTGTATCCCAATCTTCTCCAACGTGACAAATTGACCTTTCCCAATCACAACTCA     | 1320 |
| 2nd Cell | 1201 | ATTGACTCAAGTATATGCAAGGAAGTTGTCTTAGAGAGTGTGCAGCTTAGGTTAGAAGGAAAGCTGTATCCCAATCTTCTCCAACGTGACAAATTGACCTTTCCCAATCACAACTCA     | 1320 |
| 3rd Cell | 1201 | ATTGACTCAAGTATATGCAAGGAAGTTGTCTTAGAGAGTGTGCAGCTTAGGTTAGAAGGAAAGCTGTATCCCAATCTTCTCCAACGTGACAAATTGACCTTTCCCAATCACAACTCA     | 1320 |
| Plasmid  | 1321 | GGGTCGCTGGATATAAGCAGTGAATTTGGTAGCATTAACAACACAGTTAATCGGGTCGACGAGTTAATCAAGGAATCCAACGAGTGGCTGAACGCTGTGAACCCCGCCTTGTGAACAA    | 1440 |
| Egg      | 1321 | GGGTCGCTGGATATAAGCAGTGAATTTGGTAGCATTAACAACACAGTTAATCGGGTCGACGAGTTAATCAAGGAATCCAACGAGTGGCTGAACGCTGTGAACCCCGCCTTGTGAACAA    | 1440 |
| 1st Cell | 1321 | GGGTCGCTGGATATAAGCAGTGAATTTGGTAGCATTAACAACACAGTTAATCGGGTCGACGAGTTAATCAAGGAATCCAACGAGTGGCTGAACGCTGTGAACCCCGCCTTGTGAACAA    | 1440 |
| 2nd Cell | 1321 | GGGTCGCTGGATATAAGCAGTGAATTTGGTAGCATTAACAACACAGTTAATCGGGTCGACGAGTTAATCAAGGAATCCAACGAGTGGCTGAACGCTGTGAACCCCGCCTTGTGAACAA    | 1440 |
| 3rd Cell | 1321 | GGGTCGCTGGATATAAGCAGTGAATTTGGTAGCATTAACAACACAGTTAATCGGGTCGACGAGTTAATCAAGGAATCCAACGAGTGGCTGAACGCTGTGAACCCCGCCTTGTGAACAA    | 1440 |
| Plasmid  | 1441 | ACGAGCATCGTAGTCTCTGTGTCCTTGCCTGCCCTGATTATTGTCTGGCTAATAGCGCTGACAGTATGCTTCTGTACTCCGCAAGATACCTACGCTAAGTCAAAACAGATGAGGGCGCT   | 1560 |
| Egg      | 1441 | ACGAGCATCGTAGTCTCTGTGTCCTTGCCTGCCCTGATTATTGTCTGGCTAATAGCGCTGACAGTATGCTTCTGTACTCCGCAAGATACCTACGCTAAGTCAAAACAGATGAGGGCGCT   | 1560 |
| 1st Cell | 1441 | ACGAGCATCGTAGTCTCTGTGTCCTTGCCTGCCCTGATTATTGTCTGGCTAATAGCGCTGACAGTATGCTTCTGTACTCCGCAAGATACCTACGCTAAGTCAAAACAGATGAGGGCGCT   | 1560 |
| 2nd Cell | 1441 | ACGAGCATCGTAGTCTCTGTGTCCTTGCCTGCCCTGATTATTGTCTGGCTAATAGCGCTGACAGTATGCTTCTGTACTCCGCAAGATACCTACGCTAAGTCAAAACAGATGAGGGCGCT   | 1560 |
| 3rd Cell | 1441 | ACGAGCATCGTAGTCTCTGTGTCCTTGCCTGCCCTGATTATTGTCTGGCTAATAGCGCTGACAGTATGCTTCTGTACTCCGCAAGATACCTACGCTAAGTCAAAACAGATGAGGGCGCT   | 1560 |
| Plasmid  | 1561 | ATGACAGGGATCGATAGTCCATATGTAATACAGAGTGCAACTAAGATGTAG                                                                       | 1611 |
| Egg      | 1561 | ATGACAGGGATCGATAGTCCATATGTAATACAGAGTGCAACTAAGATGTAG                                                                       | 1611 |
| 1st Cell | 1561 | ATGACAGGGATCGATAGTCCATATGTAATACAGAGTGCAACTAAGATGTAG                                                                       | 1611 |
| 2nd Cell | 1561 | ATGACAGGGATCGATAGTCCATATGTAATACAGAGTGCAACTAAGATGTAG                                                                       | 1611 |
| 3rd Cell | 1561 | ATGACAGGGATCGATAGTCCATATGTAATACAGAGTGCAACTAAGATGTAG                                                                       | 1611 |

Plasmid : Plasmids for rescue experiments  
 Egg : Viruses were propagated in embryonated eggs  
 1st Cell :  
 2nd Cell :  
 3rd Cell : Each passage viruses in HEp-2 cells

## rNDV-2F/2HN (APMV-2 HN gene)

|          |      |                                                                                                                            |      |
|----------|------|----------------------------------------------------------------------------------------------------------------------------|------|
| Plasmid  | 1    | ATGGATTTCCCATCTAGGAGAACCTGGCAGCAGGTGACATATCGGGGGCGGAAGACTTTGGAGATTACTGTTCGGGATCCTCACAATTGAGCATAGGTGTGGTCTGTCTTGCCATCAATATT | 120  |
| Egg      | 1    | ATGGATTTCCCATCTAGGAGAACCTGGCAGCAGGTGACATATCGGGGGCGGAAGACTTTGGAGATTACTGTTCGGGATCCTCACAATTGAGCATAGGTGTGGTCTGTCTTGCCATCAATATT | 120  |
| 1st Cell | 1    | ATGGATTTCCCATCTAGGAGAACCTGGCAGCAGGTGACATATCGGGGGCGGAAGACTTTGGAGATTACTGTTCGGGATCCTCACAATTGAGCATAGGTGTGGTCTGTCTTGCCATCAATATT | 120  |
| 2nd Cell | 1    | ATGGATTTCCCATCTAGGAGAACCTGGCAGCAGGTGACATATCGGGGGCGGAAGACTTTGGAGATTACTGTTCGGGATCCTCACAATTGAGCATAGGTGTGGTCTGTCTTGCCATCAATATT | 120  |
| 3rd Cell | 1    | ATGGATTTCCCATCTAGGAGAACCTGGCAGCAGGTGACATATCGGGGGCGGAAGACTTTGGAGATTACTGTTCGGGATCCTCACAATTGAGCATAGGTGTGGTCTGTCTTGCCATCAATATT | 120  |
| Plasmid  | 121  | GCCACAATTGCAAAATGGATCACCTGGATAACATGGCTTCGAACACATGGACAACAACCTGAGGCTGACCGTGTGATATCTAGCATCAGCACTCCGCTCAAAGTCCCTGTCAACCAGATT   | 240  |
| Egg      | 121  | GCCACAATTGCAAAATGGATCACCTGGATAACATGGCTTCGAACACATGGACAACAACCTGAGGCTGACCGTGTGATATCTAGCATCAGCACTCCGCTCAAAGTCCCTGTCAACCAGATT   | 240  |
| 1st Cell | 121  | GCCACAATTGCAAAATGGATCACCTGGATAACATGGCTTCGAACACATGGACAACAACCTGAGGCTGACCGTGTGATATCTAGCATCAGCACTCCGCTCAAAGTCCCTGTCAACCAGATT   | 240  |
| 2nd Cell | 121  | GCCACAATTGCAAAATGGATCACCTGGATAACATGGCTTCGAACACATGGACAACAACCTGAGGCTGACCGTGTGATATCTAGCATCAGCACTCCGCTCAAAGTCCCTGTCAACCAGATT   | 240  |
| 3rd Cell | 121  | GCCACAATTGCAAAATGGATCACCTGGATAACATGGCTTCGAACACATGGACAACAACCTGAGGCTGACCGTGTGATATCTAGCATCAGCACTCCGCTCAAAGTCCCTGTCAACCAGATT   | 240  |
| Plasmid  | 241  | AATGACATGTTTCGGATTGTAGCGCTTGACCTACCTCTGCAGATGACATCATTACAGAAAGAAACAGCATCCCAAGTCGGGTCTTGGCTGAAAGTATCAACAATGTTTATCCAAGAAT     | 360  |
| Egg      | 241  | AATGACATGTTTCGGATTGTAGCGCTTGACCTACCTCTGCAGATGACATCATTACAGAAAGAAACAGCATCCCAAGTCGGGTCTTGGCTGAAAGTATCAACAATGTTTATCCAAGAAT     | 360  |
| 1st Cell | 241  | AATGACATGTTTCGGATTGTAGCGCTTGACCTACCTCTGCAGATGACATCATTACAGAAAGAAACAGCATCCCAAGTCGGGTCTTGGCTGAAAGTATCAACAATGTTTATCCAAGAAT     | 360  |
| 2nd Cell | 241  | AATGACATGTTTCGGATTGTAGCGCTTGACCTACCTCTGCAGATGACATCATTACAGAAAGAAACAGCATCCCAAGTCGGGTCTTGGCTGAAAGTATCAACAATGTTTATCCAAGAAT     | 360  |
| 3rd Cell | 241  | AATGACATGTTTCGGATTGTAGCGCTTGACCTACCTCTGCAGATGACATCATTACAGAAAGAAACAGCATCCCAAGTCGGGTCTTGGCTGAAAGTATCAACAATGTTTATCCAAGAAT     | 360  |
| Plasmid  | 361  | GGATCTGCGAGCGCTGGTCTTGTGTAATGACCTGAATATGACGGGGGGATCGCTGTGACGTTGTACCAAGGAGATGCATCTGCGAGGCTAAATTTCCAGGCCATTTCTTTAATAGAACAT   | 480  |
| Egg      | 361  | GGATCTGCGAGCGCTGGTCTTGTGTAATGACCTGAATATGACGGGGGGATCGCTGTGACGTTGTACCAAGGAGATGCATCTGCGAGGCTAAATTTCCAGGCCATTTCTTTAATAGAACAT   | 480  |
| 1st Cell | 361  | GGATCTGCGAGCGCTGGTCTTGTGTAATGACCTGAATATGACGGGGGGATCGCTGTGACGTTGTACCAAGGAGATGCATCTGCGAGGCTAAATTTCCAGGCCATTTCTTTAATAGAACAT   | 480  |
| 2nd Cell | 361  | GGATCTGCGAGCGCTGGTCTTGTGTAATGACCTGAATATGACGGGGGGATCGCTGTGACGTTGTACCAAGGAGATGCATCTGCGAGGCTAAATTTCCAGGCCATTTCTTTAATAGAACAT   | 480  |
| 3rd Cell | 361  | GGATCTGCGAGCGCTGGTCTTGTGTAATGACCTGAATATGACGGGGGGATCGCTGTGACGTTGTACCAAGGAGATGCATCTGCGAGGCTAAATTTCCAGGCCATTTCTTTAATAGAACAT   | 480  |
| Plasmid  | 481  | CCAAGTTTTGTCCTGGTCTCTACTGCTAAGGGCTGTATAAGGATCCCGACCTTCCATATGGGCCCTTCACATTTGGTGTACTACATAAACATCATTGCATCAGGTTGCCAGGATGCG      | 600  |
| Egg      | 481  | CCAAGTTTTGTCCTGGTCTCTACTGCTAAGGGCTGTATAAGGATCCCGACCTTCCATATGGGCCCTTCACATTTGGTGTACTACATAAACATCATTGCATCAGGTTGCCAGGATGCG      | 600  |
| 1st Cell | 481  | CCAAGTTTTGTCCTGGTCTCTACTGCTAAGGGCTGTATAAGGATCCCGACCTTCCATATGGGCCCTTCACATTTGGTGTACTACATAAACATCATTGCATCAGGTTGCCAGGATGCG      | 600  |
| 2nd Cell | 481  | CCAAGTTTTGTCCTGGTCTCTACTGCTAAGGGCTGTATAAGGATCCCGACCTTCCATATGGGCCCTTCACATTTGGTGTACTACATAAACATCATTGCATCAGGTTGCCAGGATGCG      | 600  |
| 3rd Cell | 481  | CCAAGTTTTGTCCTGGTCTCTACTGCTAAGGGCTGTATAAGGATCCCGACCTTCCATATGGGCCCTTCACATTTGGTGTACTACATAAACATCATTGCATCAGGTTGCCAGGATGCG      | 600  |
| Plasmid  | 601  | AGCCACTCCAGTATGTATATCTCTCGGGGTGCTGAAAGCATCGCAGACCGGGTCGCCATCTCTTTCGACAACCGGCCAGCCAGCTCGTGGATGACAACATCAACCGGAAGTCATGCAGC    | 720  |
| Egg      | 601  | AGCCACTCCAGTATGTATATCTCTCGGGGTGCTGAAAGCATCGCAGACCGGGTCGCCATCTCTTTCGACAACCGGCCAGCCAGCTCGTGGATGACAACATCAACCGGAAGTCATGCAGC    | 720  |
| 1st Cell | 601  | AGCCACTCCAGTATGTATATCTCTCGGGGTGCTGAAAGCATCGCAGACCGGGTCGCCATCTCTTTCGACAACCGGCCAGCCAGCTCGTGGATGACAACATCAACCGGAAGTCATGCAGC    | 720  |
| 2nd Cell | 601  | AGCCACTCCAGTATGTATATCTCTCGGGGTGCTGAAAGCATCGCAGACCGGGTCGCCATCTCTTTCGACAACCGGCCAGCCAGCTCGTGGATGACAACATCAACCGGAAGTCATGCAGC    | 720  |
| 3rd Cell | 601  | AGCCACTCCAGTATGTATATCTCTCGGGGTGCTGAAAGCATCGCAGACCGGGTCGCCATCTCTTTCGACAACCGGCCAGCCAGCTCGTGGATGACAACATCAACCGGAAGTCATGCAGC    | 720  |
| Plasmid  | 721  | ATCGTAGGCTCAAAATACGGTTGTGATATCTCTATGCAGTATTGTGATTGAAACAGAGGATGAGGATTATAGGTCGTATCCGGCTACTAGCATGATTATAGGTAGGCTGTTCTTCAACGGG  | 840  |
| Egg      | 721  | ATCGTAGGCTCAAAATACGGTTGTGATATCTCTATGCAGTATTGTGATTGAAACAGAGGATGAGGATTATAGGTCGTATCCGGCTACTAGCATGATTATAGGTAGGCTGTTCTTCAACGGG  | 840  |
| 1st Cell | 721  | ATCGTAGGCTCAAAATACGGTTGTGATATCTCTATGCAGTATTGTGATTGAAACAGAGGATGAGGATTATAGGTCGTATCCGGCTACTAGCATGATTATAGGTAGGCTGTTCTTCAACGGG  | 840  |
| 2nd Cell | 721  | ATCGTAGGCTCAAAATACGGTTGTGATATCTCTATGCAGTATTGTGATTGAAACAGAGGATGAGGATTATAGGTCGTATCCGGCTACTAGCATGATTATAGGTAGGCTGTTCTTCAACGGG  | 840  |
| 3rd Cell | 721  | ATCGTAGGCTCAAAATACGGTTGTGATATCTCTATGCAGTATTGTGATTGAAACAGAGGATGAGGATTATAGGTCGTATCCGGCTACTAGCATGATTATAGGTAGGCTGTTCTTCAACGGG  | 840  |
| Plasmid  | 841  | TCATACACAGAGAGCAAGATTAAACACAGGGTCCATCTTCAGTCTATTCTCTGCTAACTACCTCGCGGTGGGGTCGGGTATTGTAGTCGGGGATGAAGCCGCATTCCCAATATATGTTGGG  | 960  |
| Egg      | 841  | TCATACACAGAGAGCAAGATTAAACACAGGGTCCATCTTCAGTCTATTCTCTGCTAACTACCTCGCGGTGGGGTCGGGTATTGTAGTCGGGGATGAAGCCGCATTCCCAATATATGTTGGG  | 960  |
| 1st Cell | 841  | TCATACACAGAGAGCAAGATTAAACACAGGGTCCATCTTCAGTCTATTCTCTGCTAACTACCTCGCGGTGGGGTCGGGTATTGTAGTCGGGGATGAAGCCGCATTCCCAATATATGTTGGG  | 960  |
| 2nd Cell | 841  | TCATACACAGAGAGCAAGATTAAACACAGGGTCCATCTTCAGTCTATTCTCTGCTAACTACCTCGCGGTGGGGTCGGGTATTGTAGTCGGGGATGAAGCCGCATTCCCAATATATGTTGGG  | 960  |
| 3rd Cell | 841  | TCATACACAGAGAGCAAGATTAAACACAGGGTCCATCTTCAGTCTATTCTCTGCTAACTACCTCGCGGTGGGGTCGGGTATTGTAGTCGGGGATGAAGCCGCATTCCCAATATATGTTGGG  | 960  |
| Plasmid  | 961  | GTCAGCAGAAACACATGGTTGTTCAACACAGCTCAAGGATTTTGGTTACTTCACCCATAATGATGTGTACAAGTGCAATCCGAGCTGATATACAGCAAACTATCTCGGATGCATACAGGCCA | 1080 |
| Egg      | 961  | GTCAGCAGAAACACATGGTTGTTCAACACAGCTCAAGGATTTTGGTTACTTCACCCATAATGATGTGTACAAGTGCAATCCGAGCTGATATACAGCAAACTATCTCGGATGCATACAGGCCA | 1080 |
| 1st Cell | 961  | GTCAGCAGAAACACATGGTTGTTCAACACAGCTCAAGGATTTTGGTTACTTCACCCATAATGATGTGTACAAGTGCAATCCGAGCTGATATACAGCAAACTATCTCGGATGCATACAGGCCA | 1080 |
| 2nd Cell | 961  | GTCAGCAGAAACACATGGTTGTTCAACACAGCTCAAGGATTTTGGTTACTTCACCCATAATGATGTGTACAAGTGCAATCCGAGCTGATATACAGCAAACTATCTCGGATGCATACAGGCCA | 1080 |
| 3rd Cell | 961  | GTCAGCAGAAACACATGGTTGTTCAACACAGCTCAAGGATTTTGGTTACTTCACCCATAATGATGTGTACAAGTGCAATCCGAGCTGATATACAGCAAACTATCTCGGATGCATACAGGCCA | 1080 |
| Plasmid  | 1081 | CCTAAAATCTCAGGAAGGTTATGGGTACAAGGCATCCTATTGTGCCAGTTTTCAGTGAGACCTGATCCTGGCTGTCGCTTAAAGGTGTTCAATACCAGCAATGTGATGATGGGGGCAGAA   | 1200 |
| Egg      | 1081 | CCTAAAATCTCAGGAAGGTTATGGGTACAAGGCATCCTATTGTGCCAGTTTTCAGTGAGACCTGATCCTGGCTGTCGCTTAAAGGTGTTCAATACCAGCAATGTGATGATGGGGGCAGAA   | 1200 |
| 1st Cell | 1081 | CCTAAAATCTCAGGAAGGTTATGGGTACAAGGCATCCTATTGTGCCAGTTTTCAGTGAGACCTGATCCTGGCTGTCGCTTAAAGGTGTTCAATACCAGCAATGTGATGATGGGGGCAGAA   | 1200 |
| 2nd Cell | 1081 | CCTAAAATCTCAGGAAGGTTATGGGTACAAGGCATCCTATTGTGCCAGTTTTCAGTGAGACCTGATCCTGGCTGTCGCTTAAAGGTGTTCAATACCAGCAATGTGATGATGGGGGCAGAA   | 1200 |
| 3rd Cell | 1081 | CCTAAAATCTCAGGAAGGTTATGGGTACAAGGCATCCTATTGTGCCAGTTTTCAGTGAGACCTGATCCTGGCTGTCGCTTAAAGGTGTTCAATACCAGCAATGTGATGATGGGGGCAGAA   | 1200 |
| Plasmid  | 1201 | GCGAGGTTGATCCAAGTAGGCTCAACCGTGATCTATACCAACGCTCATCCTCATGGTGGGTGGTAGGACTGACTTACAAATTAGATGTGTGAGAAATAACTTCACAGACAGGTAAACACA   | 1320 |
| Egg      | 1201 | GCGAGGTTGATCCAAGTAGGCTCAACCGTGATCTATACCAACGCTCATCCTCATGGTGGGTGGTAGGACTGACTTACAAATTAGATGTGTGAGAAATAACTTCACAGACAGGTAAACACA   | 1320 |
| 1st Cell | 1201 | GCGAGGTTGATCCAAGTAGGCTCAACCGTGATCTATACCAACGCTCATCCTCATGGTGGGTGGTAGGACTGACTTACAAATTAGATGTGTGAGAAATAACTTCACAGACAGGTAAACACA   | 1320 |
| 2nd Cell | 1201 | GCGAGGTTGATCCAAGTAGGCTCAACCGTGATCTATACCAACGCTCATCCTCATGGTGGGTGGTAGGACTGACTTACAAATTAGATGTGTGAGAAATAACTTCACAGACAGGTAAACACA   | 1320 |
| 3rd Cell | 1201 | GCGAGGTTGATCCAAGTAGGCTCAACCGTGATCTATACCAACGCTCATCCTCATGGTGGGTGGTAGGACTGACTTACAAATTAGATGTGTGAGAAATAACTTCACAGACAGGTAAACACA   | 1320 |
| Plasmid  | 1321 | CTCAACCATGTAGACCCCATTTGCCATACAAAGTTCCCAAGACCATCTTTTCGGGCGAGATGCGTGTGCGAGGCCAAACATATGCCCTGCTGTCTGTCTCCGGAGTTTATCAGGACATT    | 1440 |
| Egg      | 1321 | CTCAACCATGTAGACCCCATTTGCCATACAAAGTTCCCAAGACCATCTTTTCGGGCGAGATGCGTGTGCGAGGCCAAACATATGCCCTGCTGTCTGTCTCCGGAGTTTATCAGGACATT    | 1440 |
| 1st Cell | 1321 | CTCAACCATGTAGACCCCATTTGCCATACAAAGTTCCCAAGACCATCTTTTCGGGCGAGATGCGTGTGCGAGGCCAAACATATGCCCTGCTGTCTGTCTCCGGAGTTTATCAGGACATT    | 1440 |
| 2nd Cell | 1321 | CTCAACCATGTAGACCCCATTTGCCATACAAAGTTCCCAAGACCATCTTTTCGGGCGAGATGCGTGTGCGAGGCCAAACATATGCCCTGCTGTCTGTCTCCGGAGTTTATCAGGACATT    | 1440 |
| 3rd Cell | 1321 | CTCAACCATGTAGACCCCATTTGCCATACAAAGTTCCCAAGACCATCTTTTCGGGCGAGATGCGTGTGCGAGGCCAAACATATGCCCTGCTGTCTGTCTCCGGAGTTTATCAGGACATT    | 1440 |
| Plasmid  | 1441 | TGGCCGATCAGTACAGCCACCAATAACAGCAACATTGTGTGGGTGGACAGTACTTAGAAGCATCTTATTCCAGGAAATACCCAAGAATAGGGATAGCAACCCAGTATGAGTGGAAAGTC    | 1560 |
| Egg      | 1441 | TGGCCGATCAGTACAGCCACCAATAACAGCAACATTGTGTGGGTGGACAGTACTTAGAAGCATCTTATTCCAGGAAATACCCAAGAATAGGGATAGCAACCCAGTATGAGTGGAAAGTC    | 1560 |
| 1st Cell | 1441 | TGGCCGATCAGTACAGCCACCAATAACAGCAACATTGTGTGGGTGGACAGTACTTAGAAGCATCTTATTCCAGGAAATACCCAAGAATAGGGATAGCAACCCAGTATGAGTGGAAAGTC    | 1560 |
| 2nd Cell | 1441 | TGGCCGATCAGTACAGCCACCAATAACAGCAACATTGTGTGGGTGGACAGTACTTAGAAGCATCTTATTCCAGGAAATACCCAAGAATAGGGATAGCAACCCAGTATGAGTGGAAAGTC    | 1560 |
| 3rd Cell | 1441 | TGGCCGATCAGTACAGCCACCAATAACAGCAACATTGTGTGGGTGGACAGTACTTAGAAGCATCTTATTCCAGGAAATACCCAAGAATAGGGATAGCAACCCAGTATGAGTGGAAAGTC    | 1560 |
| Plasmid  | 1561 | ACCAACACAGCTGTTCAATTGCAATCTGAGGAGGGGTACTCAACCAACAACATGCTTCGGGAACACCAACCGGACAAGGCATATTGTGTAGTGATATCAGAGTACGCTGATGGGGTGTTCT  | 1680 |
| Egg      | 1561 | ACCAACACAGCTGTTCAATTGCAATCTGAGGAGGGGTACTCAACCAACAACATGCTTCGGGAACACCAACCGGACAAGGCATATTGTGTAGTGATATCAGAGTACGCTGATGGGGTGTTCT  | 1680 |
| 1st Cell | 1561 | ACCAACACAGCTGTTCAATTGCAATCTGAGGAGGGGTACTCAACCAACAACATGCTTCGGGAACACCAACCGGACAAGGCATATTGTGTAGTGATATCAGAGTACGCTGATGGGGTGTTCT  | 1680 |
| 2nd Cell | 1561 | ACCAACACAGCTGTTCAATTGCAATCTGAGGAGGGGTACTCAACCAACAACATGCTTCGGGAACACCAACCGGACAAGGCATATTGTGTAGTGATATCAGAGTACGCTGATGGGGTGTTCT  | 1680 |
| 3rd Cell | 1561 | ACCAACACAGCTGTTCAATTGCAATCTGAGGAGGGGTACTCAACCAACAACATGCTTCGGGAACACCAACCGGACAAGGCATATTGTGTAGTGATATCAGAGTACGCTGATGGGGTGTTCT  | 1680 |
| Plasmid  | 1681 | GGATCATACAGGATCGTTCTTCAGCTTATAGAGATTAGAAGCAGCCACCGGTAAATCTGAGTGGA                                                          | 1743 |
| Egg      | 1681 | GGATCATACAGGATCGTTCTTCAGCTTATAGAGATTAGAAGCAGCCACCGGTAAATCTGAGTGGA                                                          | 1743 |
| 1st Cell | 1681 | GGATCATACAGGATCGTTCTTCAGCTTATAGAGATTAGAAGCAGCCACCGGTAAATCTGAGTGGA                                                          | 1743 |
| 2nd Cell | 1681 | GGATCATACAGGATCGTTCTTCAGCTTATAGAGATTAGAAGCAGCCACCGGTAAATCTGAGTGGA                                                          | 1743 |
| 3rd Cell | 1681 | GGATCATACAGGATCGTTCTTCAGCTTATAGAGATTAGAAGCAGCCACCGGTAAATCTGAGTGGA                                                          | 1743 |

C

## NDV F protein

## In this study

|                                        |     |                                                                                                       |     |
|----------------------------------------|-----|-------------------------------------------------------------------------------------------------------|-----|
| NDV Hitchner B1 (Accetion no.AF375823) | 1   | MGSRPSTKNPAPMMLTIRVALVLSICIPANSIDGRPLAAAGIVVTGDKAVNIYTSQTGSIIVKLLPNLPKDKEACAKAPLDAYNRTLTTLLTPLGDSIR   | 100 |
| NDV Beaudette C (Accetion no.JN872154) | 1   | MGPRPSTKNPVPMMLTVRVALVLSICIPANSIDGRPLAAAGIVVTGDKAVNIYTSQTGSIIVKLLPNLSKDKEACAKAPLDAYNRTLTTLLTPLGDSIR   | 100 |
| NDV Hitchner B1 (Accetion no.AF375823) | 101 | RIQESVTTSGGRQGRRLIGAIIGGVALGVATAAQITAAAALIQKQNAANILRLKESIAATNEAVHEVTDGLSQLAVAVGKMQQFVNDQFNKTAQELDCI   | 200 |
| NDV Beaudette C (Accetion no.JN872154) | 101 | RIQESVTTSGGRQGRRLIGAIIGGVALGVATAAQITAAAALIQKQNAANILRLKESIAATNEAVHEVTDGLSQLAVAVGKMQQFVNDQFNKTAQELDCI   | 200 |
| NDV Hitchner B1 (Accetion no.AF375823) | 201 | KIAQQVGVELNLYLTELTTFVFGPQITSPALNKLTIQALYNLAGGNMDYLLTKLGTGNNQLSSLIGSGLITGNPILYDSQTQLLGIQVTLPSVGNLNNMRA | 300 |
| NDV Beaudette C (Accetion no.JN872154) | 201 | RIAQQVGVELNLYLTELTTFVFGPQITSPALNKLTIQALYNLAGGNMDYLLTKLGTGNNQLSSLIGSGLITGNPILYDSQTQLLGIQVTLPSVGNLNNMRA | 300 |
| NDV Hitchner B1 (Accetion no.AF375823) | 301 | TYLETLSVSTTRGFASALVPKVVTQVGSVIEELDTSYCIETDLDLYCTRIVTFPMPSPGIYSCLSGNTSACMYSKTEGALTTPYMTIKGSVIANCKMTTCR | 400 |
| NDV Beaudette C (Accetion no.JN872154) | 301 | TYLETLSVSTTRGFASALVPKVVTQVGSVIEELDTSYCIETDLDLYCTRIVTFPMPSPGIYSCLSGNTSACMYSKTEGALTTPYMTIKGSVIANCKMTTCR | 400 |
| NDV Hitchner B1 (Accetion no.AF375823) | 401 | CVNPPGIISQNYGEAVSLIDKQSCNVLSIGGITLRLSGEFDVITYQKNISIQDSQVIITGNLDISTELGNVNNISISNALNKEESNRKLDKVNVKLTSTSA | 500 |
| NDV Beaudette C (Accetion no.JN872154) | 401 | CVNPPGIISQNYGEAVSLIDKQSCNVLSIDGITLRLSGEFDAITYQKNISIQDSQVIITGNLDISTELGNVNNISISNALNKEESNRKLDKVNVKLTSTSA | 500 |
| NDV Hitchner B1 (Accetion no.AF375823) | 501 | LITYIVLTIISLVFGILSLVACYLMYKQKAQQKTLLWLGNNTLDQMRATTKM                                                  | 553 |
| NDV Beaudette C (Accetion no.JN872154) | 501 | LITYIVLTIISLVFGILSLVACYLMYKQKAQQKTLLWLGNNTLDQMRATTKM                                                  | 553 |

Transmembrane

Endodomain

## NDV HN protein

## In this study

|                                        |     |                                                                                                          |               |                           |
|----------------------------------------|-----|----------------------------------------------------------------------------------------------------------|---------------|---------------------------|
|                                        |     | Endodomain                                                                                               | Transmembrane |                           |
| NDV Hitchner B1 (Accetion no.AF375823) | 1   | MDRAVSQVALENDEREAKNTWRLIFRIAILLTLVVTLATSVASILLYS                                                         | 4             | MGASTPSDLVGIPTRISRAEEKITS |
| NDV Beaudette C (Accetion no.AF309036) | 1   | MDRAVSQVALENDEREAKNTWRLIFRIAILLTLVVTLATSVASILLYS                                                         | 4             | MGASTPSDLVGIPTRISRAEEKITS |
| NDV Hitchner B1 (Accetion no.AF375823) | 101 | TTIMNAITSLSYQINGAANNNGWGAPIHDPDYIGGIGKELIVDDASDVTSFYPSAFQEHNLNFIAPPTGSGCTRIPSFDMSSATHYCYTHNVILSGCRDHS    | 200           |                           |
| NDV Beaudette C (Accetion no.AF309036) | 101 | TTIMNAITSLSYQINGAANNNGWGAPIHDPDYIGGIGKELIVDDASDVTSFYPSAFQEHNLNFIAPPTGSGCTRIPSFDMSSATHYCYTHNVILSGCRDHS    | 200           |                           |
| NDV Hitchner B1 (Accetion no.AF375823) | 201 | HS HQYLALGLVLRTSATGRVFFSTLRSINLDDTQNRKSCSVSATPLGCDMLCSKATETEEEDYNSAVPTRMVHGRGLGFDGQYHEKDLDVTTLEFDGWVANYP | 300           |                           |
| NDV Beaudette C (Accetion no.AF309036) | 201 | HS HQYLALGLVLRTSATGRVFFSTLRSINLDDTQNRKSCSVSATPLGCDMLCSKATETEEEDYNSAVPTRMVHGRGLGFDGQYHEKDLDVTTLEFDGWVANYP | 300           |                           |
| NDV Hitchner B1 (Accetion no.AF375823) | 301 | GVGGGSFIDSRVWFSVYGGGLKPNTPSDTVQEGKYVIYKRYNDTCPDEQDYQIRMAKSSYKPGRGFGGKRIQQAILSIKVSTSLGEDPVLTVPPNTVTLMGA   | 400           |                           |
| NDV Beaudette C (Accetion no.AF309036) | 301 | GVGGGSFIDGRVWFSVYGGGLKPNTPSDTVQEGKYVIYKRYNDTCPDEQDYQIRMAKSSYKPGRGFGGKRIQQAILSIKVSTSLGEDPVLTVPPNTVTLMGA   | 400           |                           |
| NDV Hitchner B1 (Accetion no.AF375823) | 401 | EGRILTVGTSHFLYQRGSSYFSPALLYPMTVSKDKTATLHSPYTFNAFTRPGSIPQASARCPNSCVTVGVYTDPPYPLIFYRNHRTLGRVFGTMLDGEQARLN  | 500           |                           |
| NDV Beaudette C (Accetion no.AF309036) | 401 | EGRILTVGTSHFLYQRGSSYFSPALLYPMTVSKDKTATLHSPYTFNAFTRPGSIPQASARCPNSCVTVGVYTDPPYPLIFYRNHRTLGRVFGTMLDGEQARLN  | 500           |                           |
| NDV Hitchner B1 (Accetion no.AF375823) | 501 | PASAVFDSTSRSRITRVSSSSIKAAAYTTSTCFKVVKTNKTYCLSI AEISNTLFGFEFRIVPLLV EILKDDGVREARSG                        | 577           |                           |
| NDV Beaudette C (Accetion no.AF309036) | 501 | PTSAVFDSTSRSRITRVSSSSIKAAAYTTSTCFKVVKTNKTYCLSI AEISNTLFGFEFRIVPLLV EILKDDGVREARSG                        | 577           |                           |

APMV-2 F protein

In this study

|                                       |     |                                               |     |
|---------------------------------------|-----|-----------------------------------------------|-----|
| APMV-2 (Accetion no.LC187305)         | 1   | MNQALVILLVSFQLGVALDNSVLAPIGVASAQEWQLAAYTTTLTG | 100 |
| APMV-2 Yucaipa (Accetion no.EU338414) | 1   | MNQALVILLVSFQLGVALDNSVLAPIGVASAQEWQLAAYTTTLTG | 100 |
| APMV-2 (Accetion no.LC187305)         | 101 | GAIIGSVALGVATAAQITA                           | 200 |
| APMV-2 Yucaipa (Accetion no.EU338414) | 101 | GAIIGSVALGVATAAQITA                           | 200 |
| APMV-2 (Accetion no.LC187305)         | 201 | TVFGSQITNPALSTLSYQALYS                        | 300 |
| APMV-2 Yucaipa (Accetion no.EU338414) | 201 | TVFGSQITNPALSTLSYQALYS                        | 300 |
| APMV-2 (Accetion no.LC187305)         | 301 | VPRYVAQSRVLTEELDVSTCRFSK                      | 400 |
| APMV-2 Yucaipa (Accetion no.EU338414) | 301 | VPRYVAQSRVLTEELDVSTCRFSK                      | 400 |
| APMV-2 (Accetion no.LC187305)         | 401 | IDSSICKEVVLESVQLRLEGLKSSQYFSNVTIDLSQITTS      | 500 |
| APMV-2 Yucaipa (Accetion no.EU338414) | 401 | IDSSICKEVVLESVQLRLEGLKSSQYFSNVTIDLSQITTS      | 500 |
| APMV-2 (Accetion no.LC187305)         | 501 | TVCFCYSA                                      | 536 |
| APMV-2 Yucaipa (Accetion no.EU338414) | 501 | TVCFCYSA                                      | 536 |

Endodomain

Transmembrane

APMV-2 HN protein

In this study

| this study                            |     | Endodomain                   | Transmembrane |                                        |                              |              |        |           |              |         |                   |         |        |            |         |      |        |       |       |        |       |     |
|---------------------------------------|-----|------------------------------|---------------|----------------------------------------|------------------------------|--------------|--------|-----------|--------------|---------|-------------------|---------|--------|------------|---------|------|--------|-------|-------|--------|-------|-----|
| APMV-2 (Accetion no.LC187305)         | 1   | MDFFPSRENLAAGDISGRKTWRLLFRIL | TLTSLIGVVC    | LAINIAITIAKLDHLDNMASNTWTTTEADRVISSITTP | LKVPVNQINDMFRIVALDLPLQMTSLQK | 100          |        |           |              |         |                   |         |        |            |         |      |        |       |       |        |       |     |
| APMV-2 Yucaipa (Accetion no.EU338414) | 1   | MDFFPSRENLAAGDISGRKTWRLLFRIL | TLTSLIGVVC    | LAINIAITIAKLDHLDNMASNTWTTTEADRVISSITTP | LKVPVNQINDMFRIVALDLPLQMTSLQK | 100          |        |           |              |         |                   |         |        |            |         |      |        |       |       |        |       |     |
| APMV-2 (Accetion no.LC187305)         | 101 | ETASQVGF                     | LAESINNVL     | SKNGSAGLV                              | LVDNPEYAGGIAV                | SLYQGDASAGLN | FQPI   | SLIEHPSFV | PGPTTAKGCIRI | PTFHMGP | SHWCYSHNIIASGCQDA | 200     |        |            |         |      |        |       |       |        |       |     |
| APMV-2 Yucaipa (Accetion no.EU338414) | 101 | ETASQVGF                     | LAESINNVL     | SKNGSAGLV                              | LVDNPEYAGGIAV                | SLYQGDASAGLN | FQPI   | SLIEHPSFV | PGPTTAKGCIRI | PTFHMGP | SHWCYSHNIIASGCQDA | 200     |        |            |         |      |        |       |       |        |       |     |
| APMV-2 (Accetion no.LC187305)         | 201 | SHSSMYIS                     | LGVLKASQ      | TGSPIFLT                               | TASQLVDDN                    | INRKS        | CS     | IVASKYGC  | DILCS        | IVIETED | EDYRSDPAT         | SMIIGRL | FFNGS  | SYTESKINTG | SIFSLFS | FANY | 300    |       |       |        |       |     |
| APMV-2 Yucaipa (Accetion no.EU338414) | 201 | SHSSMYIS                     | LGVLKASQ      | TGSPIFLT                               | TASQLVDDN                    | INRKS        | CS     | IVASKYGC  | DILCS        | IVIETED | EDYRSDPAT         | SMIIGRL | FFNGS  | SYTESKINTG | SIFSLFS | FANY | 300    |       |       |        |       |     |
| APMV-2 (Accetion no.LC187305)         | 301 | PAVGS                        | GIVVGDEA      | AFPIYGGV                               | KQNTWLF                      | NQLKDFGY     | FT     | HN        | DVYKCN       | RTD     | IQQTIL            | DAYRPPK | I      | SGRLWVQ    | GILLCP  | VS   | LRPDPG | CR    | LKV   | FNTSNV | MMGAE | 400 |
| APMV-2 Yucaipa (Accetion no.EU338414) | 301 | PAVGS                        | GIVVGDEA      | AFPIYGGV                               | KQNTWLF                      | NQLKDFGY     | FT     | HN        | DVYKCN       | RTD     | IQQTIL            | DAYRPPK | I      | SGRLWVQ    | GILLCP  | VS   | LRPDPG | CR    | LKV   | FNTSNV | MMGAE | 400 |
| APMV-2 (Accetion no.LC187305)         | 401 | ARLIQV                       | GSTVYLYQ      | RSSSWV                                 | VGLTYK                       | LDVSEIT      | SQTGNT | LNHVD     | PIAHTK       | FRP     | PSFER             | DACAR   | PNICPA | VCVSGV     | YQDIW   | PI   | STATN  | NSNIV | WVGQY | LE     | 500   |     |
| APMV-2 Yucaipa (Accetion no.EU338414) | 401 | ARLIQV                       | GSTVYLYQ      | RSSSWV                                 | VGLTYK                       | LDVSEIT      | SQTGNT | LNHVD     | PIAHTK       | FRP     | PSFER             | DACAR   | PNICPA | VCVSGV     | YQDIW   | PI   | STATN  | NSNIV | WVGQY | LE     | 500   |     |
| APMV-2 (Accetion no.LC187305)         | 501 | AFYSRK                       | YPRIGI        | ATQYEW                                 | KVTNQL                       | FNSNTE       | GGYSTT | TCFRN     | TKRDK        | KAYCV   | VI                | SEYADG  | VFGS   | YRIVP      | QLIEIR  | TTTG | KSE    |       |       |        |       | 580 |
| APMV-2 Yucaipa (Accetion no.EU338414) | 501 | AFYSRK                       | YPRIGI        | ATQYEW                                 | KVTNQL                       | FNSNTE       | GGYSTT | TCFRN     | TKRDK        | KAYCV   | VI                | SEYADG  | VFGS   | YRIVP      | QLIEIR  | TTTG | KSE    |       |       |        |       | 580 |



**Figure S2. Analysis of chimeric NDVs genome stability.**

(A) Summary of sequenced samples. (B) Comparison of gene sequences in each sample. (C) Comparison of gene sequences between the viruses used in each study.

# HEp-2 cells

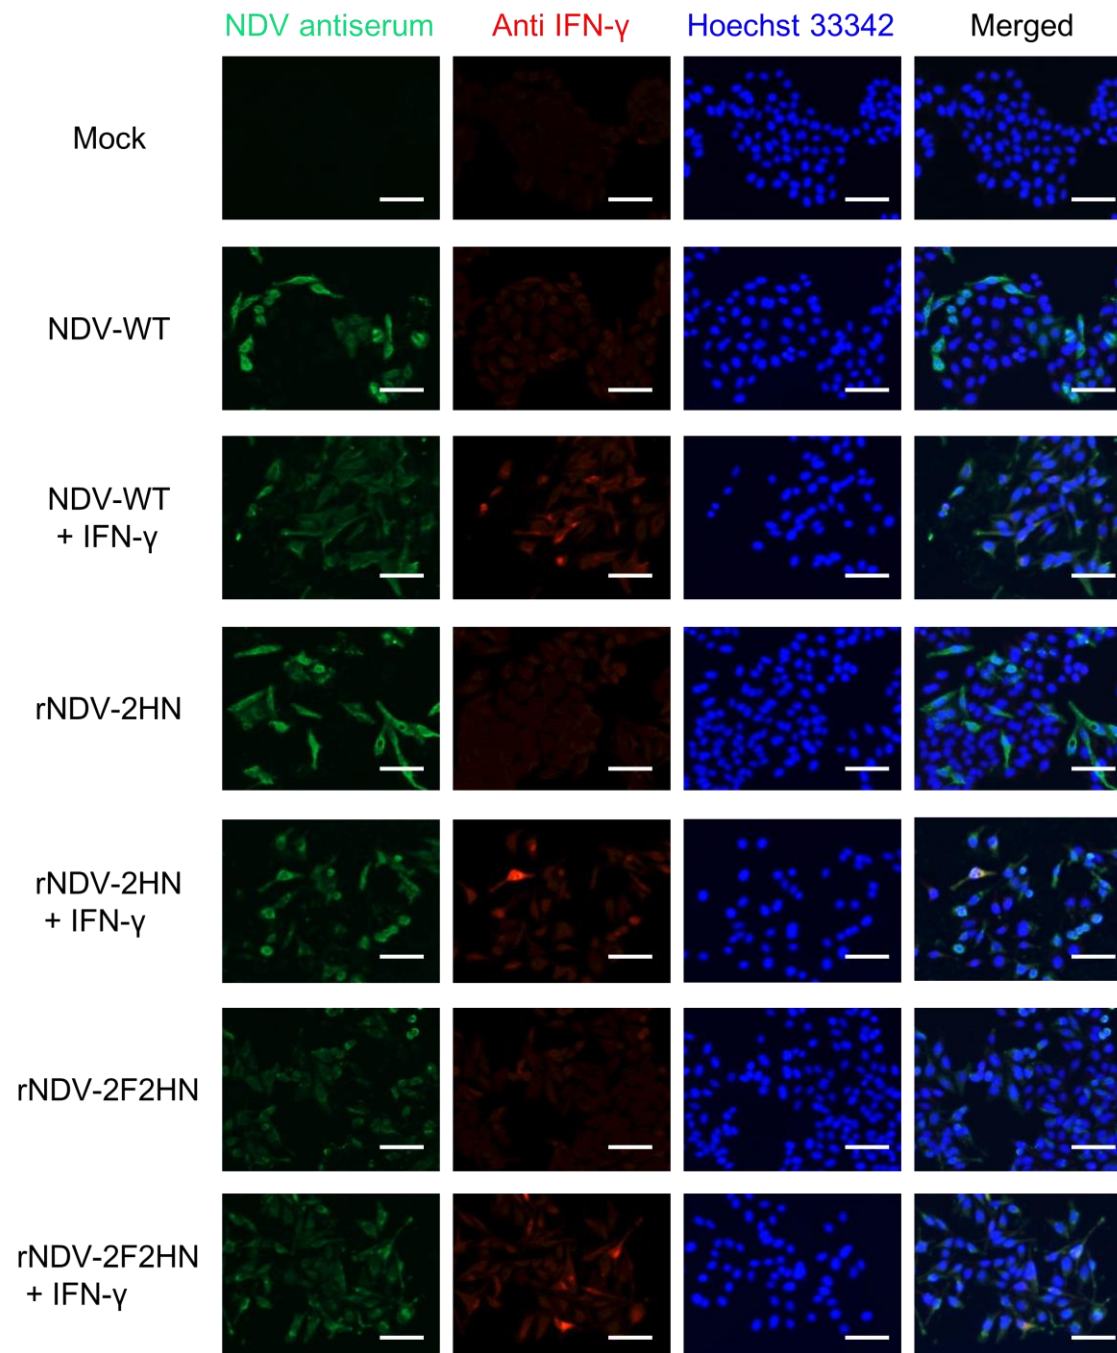

**Figure S3. INF- $\gamma$  expression was detected in infected cells with recombinant NDVs + IFN- $\gamma$ .**

Cells infected with each virus at an MOI of 0.5 were stained using anti-NDV antiserum (green), INF- $\gamma$  antibody (red), and Hoechst 33342 (blue; nuclei). Scale bar: 50  $\mu$ m

A

Fig.4 experiment

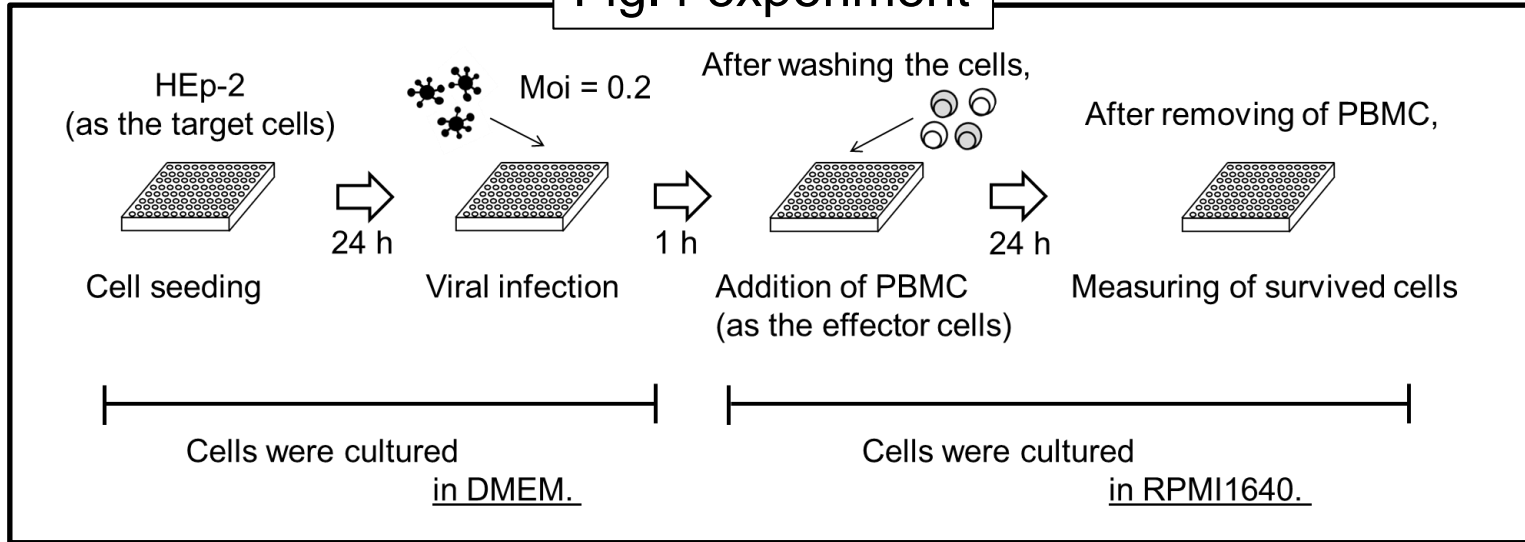

B

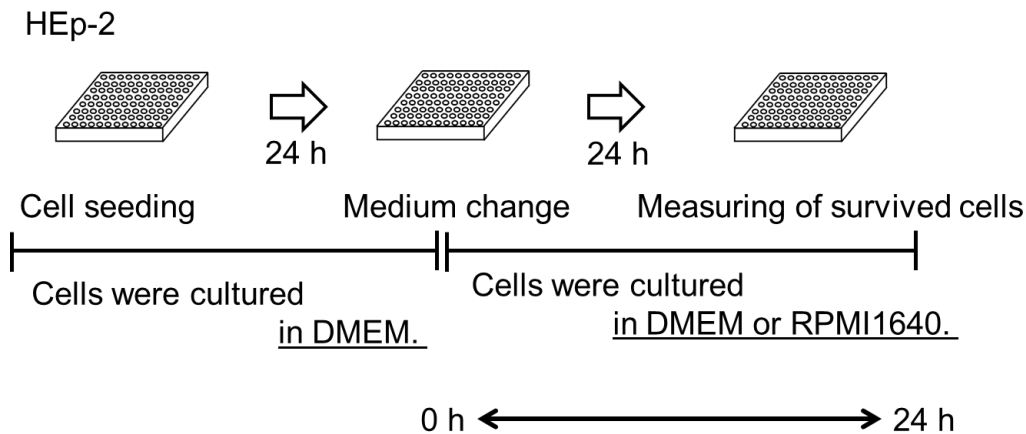

C

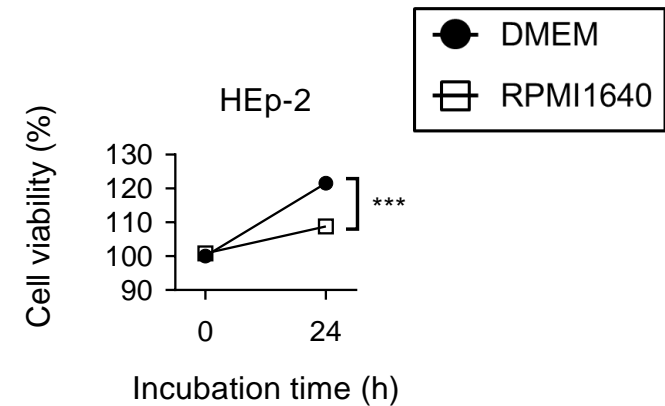

**Figure S4. HEp-2 cells proliferation was modified by RPMI1640 medium.**

(A) Schema of the killing assay in Fig. 4. After addition of PBMC, the culture medium was changed to RPMI1640 medium. (B) Schema of the cell viability assay under the killing assay conditions. (C) Cell viability was evaluated by MTT assay at 0 and 24 hours post medium change.

**Table S1. Primer sets used in this study.**

| Primer set          | Primer  | Sequence                     |
|---------------------|---------|------------------------------|
| NDV F + NDV HN      | Forward | 5'-TGACCAGCACATCTGCTCTC-3'   |
|                     | Reverse | 5'-AGCCAAGGTCAC TACTGT TA-3' |
| NDV F + APMV2 HN    | Forward | 5'-TGACCAGCACATCTGCTCTC-3'   |
|                     | Reverse | 5'-TGATGTCATCTGCAGAGGTA-3'   |
| APMV2 F + APMV2 HN  | Forward | 5'-ACGACATTGGCTCCGTAACA-3'   |
|                     | Reverse | 5'-TGATGTCATCTGCAGAGGTA-3'   |
| NDV 6001 + NDV 6180 | Forward | 5'-GAAAATCAAGCGCCTTGC-3'     |
|                     | Reverse | 5'-TCCTTAATGTAGCTAG-3'       |
